# Supplementary material for: Internet addiction among adolescents during the COVID-19 pandemic: Associations with sociodemographic and psychological distress
Source: PeerJ. 2024 Jun 28;12:e17489. doi: 10.7717/peerj.17489 (PMC11216186; doi:10.7717/peerj.17489)
Supplement: Supplemental Information 1 [file peerj-12-17489-s001.xlsx]

## Sheet: Sheet1
Bil	Respondent ID	Collector ID	Start Date	End Date	Saya telah membaca serta memahami kenyataan penyelidik. Saya bersetuju dan membenarkan anak saya untuk menyertai tinjauan ini.I have read and understand the researcher's statement. I agreed to allow my child to join the survey.	UmurAge	JantinaGender	BangsaRace	Daerah anda bersekolahYour school's district	Adakah anda merupakan anak tunggal dalam keluarga anda?Are you the only child in the family?	Apakah tahap pendidikan paling tinggi bagi IBU anda?What is your MOTHER's highest education level?		Apakah tahap pendidikan paling tinggi bagi BAPA anda?What is your FATHER'S highest education level?		Berapakah jumlah anggaran hasil pendapatan bulanan kedua-dua ibu dan bapa anda?What is your parent’s estimated combined income every month?		Jenis alat elektronik yang manakah sering digunakan oleh anda untuk melayari Internet?What types of electronic devices used for you to surf the Internet?	Berapa kerapkah anda menggunakan alat elektronik tersebut untuk melayari Internet setiap hari?How often did you used electronic devices daily?	Berapa kerapkah anda menggunakan alat elektronik tersebut selepas jam 12 tengah malam untuk melayari Internet setiap hari?How often did you use electronic devices to surf the Internet after pass midnight daily?	Berapa lamakah anda menghabiskan masa melayari Internet setiap kali menggunakan alat elektronik tersebut?How long the duration did you used to surf Internet daily?	MVIAT 1 - 5					MVIAT 6 - 10					MVIAT 11 - 15					MVIAT 16 - 20					Total Score	M-DASS-21 1 - 7							M-DASS-218 - 14
					Setuju	Response	Response	Response	Response	Response	Response	Lain (sila nyatakan)	Response	Lain (sila nyatakan)	Response	Other (please specify)	Response	Response	Response	Response	1. Berapa kerapkah anda mendapati yang anda melayari internet lebih lama dari masa yang dirancang? How often do you find that you stay online longer than you intended?	2. Berapa kerapkah anda mengabaikan tugasan pelajaran/ kerja rumah anda untuk menghabiskan lebih banyak masa melayari internet? How often do you neglect household chores to spend more time on-line?	3. Berapa kerapkah anda memilih keseronokan internet berbanding hubungan rapat yang terjalin dengan kawan/pasangan anda? How often do you prefer the excitement of the Internet to intimacy with your partner?	4. Berapa kerapkah anda memulakan hubungan baru dengan pengguna internet yang lain? How often do you form new relationships with fellow online users?	5. Berapa kerapkah orang-orang didalam hidup anda mengadu kepada anda mengenai jumlah masa yang anda gunakan untuk melayari internet? How often do others in your life complain to you about the amount of time you spend online?	6. Berapa kerapkah pelajaran kamu terjejas (cth. ponteng kelas, menangguhkan kerja, tidak menyiapkan tugasan tepat pada masa, dll) disebabkan oleh masa yang anda habiskan untuk melayari internet? How often do your grades or schoolwork suffers because of the amount of time you spend on-line?	7. Berapa kerapkah anda memeriksa email anda sebelum anda melakukan perkara lain? How often do you check your email before something else that you need to do?	8. Berapa kerapkah pencapaian akademik atau produktiviti anda terjejas disebabkan oleh penggunaan internet? How often does your job performance or productivity suffer because of the Internet?	9. Berapa kerapkah anda cuba mempertahankan diri atau berahsia apabila seseorang bertanyakan mengenai aktiviti anda (apa yang anda lakukan) di internet? How often do you become defensive or secretive when anyone asks you what you do online?	10. Berapa kerapkah anda cuba melupakan pemikiran yang terganggu mengenai kehidupan anda dengan pemikiran yang boleh menenangkan di Internet? How often do you block out disturbing thoughts about your life with soothing thoughts of the Internet?	11. Berapa kerapkah anda mendapati diri anda tertunggu-tunggu atau mengharapkan untuk segera menggunakan internet lagi apabila anda tidak menggunakannya?How often do you find yourself anticipating when you will go online again?	12. Berapa kerapkah anda merasa bimbang apabila memikirkan kehidupan tanpa internet akan menjadi bosan, kosong dan tidak menyeronokkan?How often do you fear that life without the Internet would be boring, empty, and joyless?	13. Berapa kerapkah anda marah, menjerit atau menunjukkan reaksi tidak gembira kepada seseorang yang mengganggu anda ketika anda melayari Internet?How often do you snap, yell, or act annoyed if someone bothers you while you are online?	14. Berapa kerapkah anda kurang tidur disebabkan melayari internet hingga lewat malam?How often do you lose sleep due to late-night logins	15. Berapa kerapkah anda asyik terfikir tentang internet atau berkhayal melayarinya walaupun anda tidak menggunakan Internet pada masa itu?How often do you feel preoccupied with the Internet when off-line, or fantasize about being on- line?	16. Berapa kerapkah anda berkata kepada diri sendiri “sekejap lagi/ beberapa minit lagi” apabila anda melayari Internet? How often do you find yourself saying “just a few more minutes” when on-line?	17. Berapa kerapkah anda cuba untuk mengurangkan masa anda melayari Internet tetapi tidak berjaya? How often do you try to cut down the amount of time you spend on-line and fail?	18. Berapa kerapkah anda cuba menyorokkan daripada orang lain mengenai jumlah masa yang anda gunakan untuk melayari Internet?How often do you try to hide how long you’ve been online?	19. Berapa kerapkah anda memilih untuk menghabiskan lebih banyak masa melayari Internet berbanding keluar bersosial dengan rakan-rakan anda?How often do you choose to spend more time online over going out with others?	20. Berapa kerapkah anda merasa sedih, berperasaan tidak menentu dan gementar apabila tidak melayari internet, di mana semua perasaan ini akan hilang sebaik saja anda menggunakan Internet semula?How often do you feel depressed, moody or nervous when you are off-line, which goes away once you are back online?	MVIAT	1. Saya dapati diri saya sukar ditenteramkan I found it hard to wind down	2. Saya sedar mulut saya terasa kering I was aware of dryness of my mouth	3. Saya dak dapat mengalami perasaan positif sama sekali I couldn’t seem to experience any positive feeling at all	4. Saya mengalami kesukaran bernafas. Contohnya pernafasan yang laju, tercungap-cungap walaupun tidak melakukan senaman fizikal I experienced breathing difficulty e.g., excessively rapid breathing, breathlessness in the absence of physical exertion	5. Saya sukar untuk mendapatkan semangat bagi melakukan sesuatu perkara I found it difficult to work up the initiative to do things	6. Saya cenderung untuk bertindak keterlaluan dalam sesuatu keadaan I tended to over-react to situations	7. Saya rasa mengeletar contohnya pada tangan I experience trembling e.g., in the hands	8. Saya rasa saya menggunakan banyak tenaga dalam keadaan cemasI felt that I was using a lot of nervous energy
1	12706073866	405035993	2021-06-02 01:22:12	2021-06-02 01:31:20	1	1	1	1	1	2	2		2		1	1457	1	3	0	4	2	2	2	1	4	2	1	1	1	1	1	1	1	1	1	2	2	2	4	1	33	0	0	0	0	0	0	0	0
2	12705291530	405035993	2021-06-01 21:21:55	2021-06-01 21:31:42	1	2	1	2	1	2	1		2		1		1	1	2	1	5	2	5	1	5	1	2	3	4	2	4	4	5	1	4	4	3	3	4	4	66	1	1	0	0	0	0	0	2
3	12705212843	405035993	2021-06-01 20:57:50	2021-06-01 21:07:15	1	5	1	1	1	2	2		0	tidak tahu	1		1	1	1	1	5	2	1	2	1	2	5	1	1	3	1	1	1	3	1	1	1	1	1	1	35	0	2	0	0	0	0	0	0
4	12705010209	405035993	2021-06-01 19:50:20	2021-06-01 20:02:35	1	3	2	3	3	2	5		5		1		1	3	4	4	2	3	1	1	1	1	2	1	1	1	1	1	1	1	1	1	1	1	1	1	24	0	0	0	0	0	0	0	0
5	12704833299	405035993	2021-06-01 18:33:52	2021-06-01 18:43:17	1	4	2	1	3	2	4		2		1		1	1	2	1	2	1	1	2	1	2	2	1	1	2	2	2	1	1	1	1	1	1	1	1	27	0	0	2	2	2	1	1	2
6	12704799767	405035993	2021-06-01 18:18:20	2021-06-01 18:41:11	1	3	2	1	1	2	4		4		2		4	2	1	2	2	2	1	1	3	2	1	1	1	2	2	2	2	2	1	4	4	2	1	1	37	0	0	0	0	0	0	0	0
7	12704603402	405035993	2021-06-01 16:40:47	2021-06-01 16:54:14	1	3	2	1	1	2	5		2		2		1	1	0	1	3	2	2	2	2	1	1	1	1	2	1	2	1	1	1	3	2	1	2	1	32	0	1	0	0	0	0	0	0
8	12704399049	405035993	2021-06-01 14:37:54	2021-06-01 14:49:20	1	1	1	1	3	2	0	Ijazah Sarjana Muda Kepujian	4		2		1	1	4	3	4	1	1	2	2	1	2	1	2	2	2	1	1	1	1	1	1	2	1	1	30	1	1	1	0	0	1	1	1
9	12704360519	405035993	2021-06-01 14:14:24	2021-06-01 14:21:59	1	4	2	1	2	2	3		2		2		1	3	0	2	2	1	1	2	1	1	2	1	1	1	1	1	1	1	1	1	1	1	1	1	23	0	0	0	0	0	0	0	1
10	12704337739	405035993	2021-06-01 14:00:03	2021-06-01 14:18:21	1	3	1	1	1	2	2		2		1		1	2	0	3	4	2	1	1	1	3	2	1	1	2	2	1	5	4	1	2	5	1	2	3	44	2	0	1	0	0	0	1	2
11	12704279899	405035993	2021-06-01 13:19:10	2021-06-01 13:28:18	1	4	2	1	2	2	1		2		1	B40	1	1	1	2	3	2	2	1	5	1	1	2	1	4	3	3	2	2	1	5	2	5	1	2	48	0	1	0	0	1	0	0	1
12	12704260528	405035993	2021-06-01 13:04:37	2021-06-01 13:27:10	1	4	2	1	2	2	4		0	SIJIL POLITEKNIK	2		1	1	0	4	3	2	2	1	3	2	2	2	1	1	2	1	3	1	1	3	2	2	1	1	36	0	0	0	0	1	0	0	1
13	12704240505	405035993	2021-06-01 12:48:13	2021-06-01 13:07:45	1	2	2	1	3	2	2		2		1		1	1	2	3	2	2	4	2	2	4	2	1	5	1	2	1	2	2	1	2	2	2	2	1	42	0	1	0	0	1	0	0	0
14	12704182922	405034743	2021-06-01 12:07:11	2021-06-01 12:16:20	1	2	2	2	3	2	2		2		1	ayah rm3000	1	1	3	1	5	2	2	1	2	1	3	1	1	2	3	3	2	2	2	2	2	1	1	1	39	0	1	0	0	1	1	0	1
15	12704172699	405035993	2021-06-01 11:59:01	2021-06-01 12:29:59	1	4	1	3	3	2	2		2		1	RM 1000	3	1	4	4	3	2	1	3	1	1	3	5	1	3	2	1	3	1	1	1	3	1	3	1	40	0	0	0	0	3	2	1	0
16	12704135124	405035993	2021-06-01 11:28:21	2021-06-01 11:58:47	1	2	1	1	3	2	2		2		1		1	1	3	1	1	1	1	3	1	2	1	2	4	1	2	1	1	2	1	2	2	1	2	1	32	1	1	0	1	0	2	1	1
17	12703979702	405035993	2021-06-01 09:32:12	2021-06-01 09:43:23	1	4	2	1	2	2	2		3		1		1	1	4	4	1	1	1	1	1	1	2	1	1	1	2	1	1	2	1	1	2	1	1	1	24	0	0	0	0	0	1	0	0
18	12703968769	405034743	2021-06-01 09:22:45	2021-06-01 15:05:52	1	2	2	2	3	2	2		2		2		1	2	0	2	3	1	1	1	3	1	2	1	1	1	2	3	1	1	1	1	1	1	1	1	28	0	0	0	0	0	0	1	0
19	12703948298	405035993	2021-06-01 09:08:54	2021-06-01 09:25:39	1	2	2	1	2	2	2		2		1	RM800 - RM1000	1	1	2	3	2	1	2	2	2	2	1	4	1	1	2	1	2	2	1	2	2	1	2	1	34	1	0	0	1	0	0	1	0
20	12703920132	405035993	2021-06-01 08:15:02	2021-06-01 09:13:50	1	5	2	1	3	2	2		2		1		1	2	4	3	2	2	2	2	3	2	2	3	1	1	2	2	2	2	1	2	5	2	1	1	40	1	1	1	0	1	1	3	1
21	12703746940	405035993	2021-06-01 07:06:06	2021-06-01 07:17:32	1	5	2	1	1	2	3		3		1		1	2	0	1	5	4	2	2	3	5	2	5	4	4	5	5	4	2	5	5	5	5	4	5	81	3	1	1	0	2	1	1	3
22	12703677892	405035993	2021-06-01 06:24:41	2021-06-01 07:18:28	1	2	1	1	2	2	2		2		1	Rm1800	1	1	0	2	2	1	1	2	3	1	1	1	1	2	3	2	2	2	1	2	2	1	3	3	36	1	1	0	1	0	1	1	2
23	12703036610	405035993	2021-05-31 23:22:10	2021-05-31 23:46:03	1	5	2	3	1	2	3		4		1	3000	1	1	2	4	3	3	3	1	1	1	2	3	1	3	1	3	1	3	2	2	2	3	1	2	41	1	1	0	1	3	0	0	1
24	12703015122	405035993	2021-05-31 23:12:42	2021-05-31 23:29:34	1	4	2	1	3	2	4		3		3		1	1	4	3	3	3	2	2	1	3	2	2	2	2	2	1	3	3	1	4	4	4	2	3	49	1	0	0	0	1	0	0	1
25	12702942807	405035993	2021-05-31 22:38:37	2021-05-31 22:48:54	1	3	2	1	3	2	3		3		1		1	1	1	3	3	2	2	2	2	2	2	2	1	1	1	2	2	2	2	1	1	1	2	1	34	0	0	0	0	1	0	0	1
26	12702887834	405035993	2021-05-31 22:13:09	2021-05-31 22:38:44	1	2	1	1	2	2	2		2		1		1	4	0	4	1	2	1	1	2	1	1	1	1	1	2	1	2	1	1	2	1	1	3	1	27	1	0	1	0	1	1	0	1
27	12702854027	405035993	2021-05-31 21:57:16	2021-05-31 22:46:14	1	2	1	1	3	2	3		2		2		1	1	4	4	2	2	1	1	2	2	1	2	1	3	1	1	1	2	1	2	2	1	1	1	30	0	1	1	0	0	0	0	1
28	12702851919	405035993	2021-05-31 21:57:09	2021-05-31 22:14:54	1	5	2	2	3	2	3		2		1		2	1	1	1	2	1	2	1	1	1	5	1	1	2	2	3	2	2	1	1	1	1	4	1	35	3	2	2	2	1	1	1	1
29	12702835708	405035993	2021-05-31 21:47:21	2021-05-31 22:11:46	1	5	2	1	1	2	1		2		1		3	1	0	2	3	3	1	1	1	2	1	2	2	1	2	1	2	1	1	2	1	1	1	1	30	2	0	0	0	0	0	0	3
30	12702821611	405035993	2021-05-31 21:43:06	2021-05-31 21:56:17	1	2	2	3	3	2	2		2		1		1	1	3	3	2	3	2	1	1	1	1	1	1	1	1	2	1	1	1	2	1	1	3	1	28	0	0	0	0	0	0	0	0
31	12702778232	405035993	2021-05-31 21:22:07	2021-05-31 21:36:17	1	1	2	1	3	2	2		2		2		1	2	4	3	2	1	1	1	2	1	4	1	2	2	2	2	3	2	1	2	1	1	1	2	34	1	0	0	1	1	0	0	1
32	12702775028	405035993	2021-05-31 21:21:13	2021-05-31 21:31:59	1	4	2	1	3	2	2		2		1		1	1	0	2	4	2	1	3	2	2	1	1	1	3	3	2	2	1	1	3	3	2	1	1	39	0	2	0	1	1	1	0	0
33	12702760982	405035993	2021-05-31 21:14:36	2021-05-31 21:46:34	1	3	2	2	1	2	1		1		1		2	1	4	1	5	5	1	2	1	1	1	1	1	1	1	1	1	1	1	1	1	1	1	1	29	0	0	0	0	0	0	0	0
34	12702756771	405035993	2021-05-31 21:12:16	2021-05-31 21:22:30	1	5	2	1	1	2	2		3		1		1	1	4	4	2	2	2	1	1	2	2	2	2	2	2	2	2	1	1	2	1	1	2	2	34	0	1	1	0	1	1	1	1
35	12702742267	405035993	2021-05-31 21:05:21	2021-05-31 21:23:27	1	1	1	1	2	2	2		2		2		1	1	0	4	2	2	2	1	2	2	1	2	1	1	1	1	2	1	1	2	1	1	1	1	28	1	0	0	0	0	1	0	1
36	12702731007	405035993	2021-05-31 21:00:15	2021-05-31 21:11:36	1	5	2	1	1	2	4		4		2		4	1	1	2	4	4	3	1	1	2	1	2	1	2	3	1	2	4	1	4	3	1	2	1	43	0	0	0	0	1	1	1	2
37	12702729929	405035993	2021-05-31 20:59:49	2021-05-31 21:24:06	1	1	1	1	3	2	4		5		3		1	1	1	1	5	3	3	4	3	3	2	3	2	4	4	3	3	3	2	3	3	3	3	2	61	1	2	1	1	2	1	1	1
38	12702704846	405035993	2021-05-31 20:46:51	2021-05-31 23:10:31	1	2	2	1	1	2	0	Diploma	0	Certificate of Polytechnic	1		1	1	1	2	5	2	4	5	1	2	2	1	1	1	1	2	2	4	1	5	2	5	2	1	49	1	0	1	0	1	0	0	1
39	12702703532	405035993	2021-05-31 20:45:40	2021-05-31 21:04:07	1	3	1	1	3	1	4		4		2		1	1	3	1	2	2	2	2	2	2	2	1	2	2	2	2	2	2	2	2	2	2	2	2	39	1	1	1	0	1	1	0	1
40	12702676824	405035993	2021-05-31 20:36:06	2021-05-31 20:46:20	1	3	1	1	3	2	0	Tidak sekolah	2		1		1	1	1	1	4	2	2	3	2	1	1	1	2	3	2	5	3	4	4	2	2	1	2	2	48	2	1	1	3	1	1	2	2
41	12702673592	405035993	2021-05-31 20:33:50	2021-05-31 20:54:34	1	3	2	1	3	2	2		1		1		1	1	1	1	1	5	1	1	1	1	2	1	1	1	1	1	5	2	1	1	1	1	2	1	31	1	0	0	0	0	2	0	0
42	12702664497	405035993	2021-05-31 20:30:13	2021-05-31 20:42:23	1	3	2	1	3	2	2		2		1		1	1	1	2	2	3	2	4	2	5	2	3	2	3	2	2	3	4	1	3	3	2	2	2	52	1	0	1	0	1	1	1	1
43	12702662763	405035993	2021-05-31 20:30:20	2021-05-31 20:38:30	1	3	1	1	1	2	4		0	Sarjana	3		1	1	1	1	5	5	2	1	2	4	1	2	2	3	4	2	2	3	5	5	5	2	2	1	58	1	0	0	0	1	1	0	2
44	12702659024	405035993	2021-05-31 20:28:38	2021-05-31 20:46:50	1	3	2	1	3	2	4		4		1		1	1	1	1	5	3	3	4	5	4	1	3	2	5	3	1	4	5	1	5	3	2	5	3	67	1	1	2	3	2	1	3	2
45	12702646842	405035993	2021-05-31 20:23:18	2021-05-31 20:39:41	1	5	2	1	1	2	2		3		1		1	1	1	1	3	1	2	1	1	1	1	3	1	2	5	5	2	5	1	4	5	4	5	1	53	0	1	0	0	2	0	1	0
46	12702646511	405035993	2021-05-31 20:21:39	2021-05-31 20:34:53	1	5	2	1	1	2	4		4		2		1	1	1	1	4	3	3	3	2	3	3	3	5	4	3	2	2	3	2	4	3	3	2	1	58	1	0	0	0	0	0	0	1
47	12702644701	405035993	2021-05-31 20:21:16	2021-05-31 20:33:13	1	5	2	1	1	2	4		4		2		1	1	2	1	3	2	2	2	1	2	5	2	2	3	3	1	1	2	2	2	3	1	3	1	43	1	0	1	1	3	1	3	3
48	12702633954	405035993	2021-05-31 20:17:27	2021-05-31 20:35:53	1	1	2	1	1	2	2		2		1		1	1	4	1	3	2	4	4	2	2	1	1	1	1	1	2	2	2	2	1	2	2	1	2	38	1	2	2	3	3	1	3	2
49	12702608708	405035993	2021-05-31 20:07:48	2021-05-31 20:25:25	1	3	1	1	3	2	5		5		1		1	1	1	3	4	2	4	2	2	2	4	2	3	3	2	5	5	4	3	3	2	3	2	5	62	1	1	2	0	0	1	1	2
50	12702595072	405035993	2021-05-31 20:03:17	2021-05-31 20:10:46	1	5	1	1	3	2	2		2		1		1	1	2	2	4	3	5	1	1	2	2	1	1	2	2	2	2	3	1	2	1	1	1	1	38	1	2	2	0	3	0	1	1
51	12702589190	405035993	2021-05-31 20:01:22	2021-05-31 20:09:54	1	5	2	1	1	2	3		4		2		1	1	1	1	5	5	3	1	2	3	4	2	5	5	5	3	3	5	2	4	5	5	3	3	73	2	3	2	1	3	0	0	1
52	12702562638	405035993	2021-05-31 19:53:04	2021-05-31 20:02:27	1	4	1	1	1	2	5		4		3		1	1	3	2	3	1	2	1	1	1	3	2	2	2	2	2	2	2	2	3	4	3	3	1	42	3	3	3	2	2	2	3	3
53	12702537141	405035993	2021-05-31 19:40:34	2021-05-31 19:51:50	1	1	1	1	1	2	2		2		2		1	1	1	1	3	2	2	4	2	2	4	2	2	2	2	2	2	2	4	2	4	2	2	2	49	1	1	1	0	2	1	1	1
54	12702505406	405035993	2021-05-31 19:27:38	2021-05-31 19:41:31	1	5	2	1	2	2	2		2		1		1	1	1	2	3	2	2	2	3	2	2	2	2	3	2	2	2	3	1	3	3	2	1	2	44	2	1	1	2	3	2	2	2
55	12702504191	405035993	2021-05-31 19:26:48	2021-05-31 19:42:21	1	5	2	1	2	1	3		0	Tidak tahu	2		1	1	1	2	4	4	4	4	2	5	4	5	2	3	3	2	3	5	3	5	5	4	5	4	76	2	2	2	1	3	2	1	2
56	12702479606	405035993	2021-05-31 19:12:36	2021-05-31 19:33:13	1	3	1	1	3	2	2		2		1		1	1	1	1	2	3	4	5	5	3	1	2	2	4	3	2	2	4	4	5	3	5	2	2	63	1	0	1	1	1	1	1	2
57	12702473485	405035993	2021-05-31 19:07:19	2021-05-31 19:20:09	1	1	1	1	1	2	2		3		1		1	1	4	1	3	2	3	2	5	3	2	3	2	2	2	2	3	2	3	3	3	2	3	2	52	1	0	1	1	2	1	1	1
58	12702473009	405035993	2021-05-31 19:09:25	2021-05-31 19:22:39	1	3	1	1	1	2	2		2		1		1	1	3	4	3	4	2	2	2	3	1	2	5	5	2	1	1	2	2	5	4	4	2	1	53	0	1	1	2	1	1	2	2
59	12702460434	405035993	2021-05-31 19:01:47	2021-05-31 19:19:08	1	3	2	1	1	1	2		2		1		1	1	0	2	2	1	1	2	1	1	2	1	1	1	1	1	1	1	1	2	1	1	1	1	24	0	0	0	0	0	0	0	1
60	12702455602	405035993	2021-05-31 19:00:18	2021-05-31 19:30:53	1	3	2	1	1	2	5		2		1		1	1	1	1	3	2	5	5	4	3	1	5	5	5	5	5	5	5	5	5	5	5	5	5	88	3	3	3	3	3	3	3	3
61	12702454505	405035993	2021-05-31 18:59:38	2021-05-31 19:07:52	1	2	1	1	1	2	2		2		1		1	1	0	2	1	1	1	2	1	1	2	1	1	2	1	2	2	1	2	2	2	1	1	1	28	0	2	0	0	0	0	1	2
62	12702442828	405035993	2021-05-31 18:53:22	2021-05-31 19:06:23	1	2	2	1	3	2	2		2		1		1	3	4	4	3	2	2	2	1	1	2	2	1	2	1	2	1	1	1	1	1	1	1	1	29	1	1	1	1	1	0	1	1
63	12702439571	405035993	2021-05-31 18:50:32	2021-05-31 19:08:41	1	5	2	1	1	1	2		2		1		1	1	2	2	4	3	2	1	2	2	2	3	1	2	2	3	3	3	1	3	3	1	2	1	44	0	0	0	0	1	0	0	0
64	12702378241	405035993	2021-05-31 18:21:30	2021-05-31 18:28:38	1	5	2	1	1	2	4		4		2		1	1	1	1	5	2	3	1	2	1	1	5	4	4	3	3	2	5	3	5	5	5	3	1	63	1	1	2	0	2	0	0	1
65	12702370971	405035993	2021-05-31 18:17:01	2021-05-31 18:26:34	1	5	2	1	1	2	2		2		1		1	2	1	1	5	3	4	5	2	3	2	1	1	5	3	2	3	4	1	3	3	2	2	1	55	2	2	2	2	2	2	0	2
66	12702369652	405035993	2021-05-31 16:27:12	2021-05-31 18:30:57	1	3	2	1	3	2	2		2		1		1	2	3	3	2	1	1	1	1	2	2	1	1	2	2	2	2	2	1	4	1	2	1	1	32	1	1	1	0	1	0	2	0
67	12702352034	405035993	2021-05-31 18:06:49	2021-05-31 18:23:56	1	1	1	1	3	2	2		2		1		1	1	0	1	2	2	2	1	1	1	2	1	4	2	1	1	1	2	1	1	1	1	2	1	30	0	0	0	0	0	0	0	0
68	12702351081	405035993	2021-05-31 18:04:32	2021-05-31 18:30:28	1	4	2	1	1	1	3		2		2		1	1	1	1	4	2	2	1	1	2	2	3	2	2	1	2	2	4	1	2	1	2	2	1	39	0	1	1	0	1	1	1	1
69	12702338545	405035993	2021-05-31 17:59:10	2021-05-31 18:08:19	1	3	2	1	2	2	3		3		2		1	1	4	3	3	2	5	1	1	2	3	2	1	3	2	2	2	4	2	4	5	1	5	1	51	2	2	1	1	2	3	1	3
70	12702301556	405035993	2021-05-31 17:38:06	2021-05-31 18:09:01	1	4	1	1	3	2	2		1		1		1	1	2	2	3	2	4	2	2	2	2	2	2	2	2	2	2	4	1	4	4	2	4	1	49	1	1	0	1	1	0	1	1
71	12702301379	405035993	2021-05-31 17:37:35	2021-05-31 18:00:52	1	4	2	1	3	2	3		3		1		1	2	0	4	2	1	2	2	1	2	1	2	1	1	2	1	2	1	1	1	2	1	2	1	29	0	0	0	0	0	0	0	0
72	12702290142	405035993	2021-05-31 17:32:46	2021-05-31 17:42:57	1	1	1	1	3	1	3		3		2		1	3	3	2	1	1	1	2	2	1	3	1	3	3	2	2	1	1	1	2	3	1	2	1	34	0	1	0	0	0	0	1	0
73	12702288311	405034743	2021-05-31 17:31:29	2021-05-31 17:37:02	1	1	1	1	3	2	4		5		2		2	1	1	1	4	3	3	3	3	3	3	3	3	3	3	3	3	3	3	3	3	3	3	3	61	1	1	1	0	0	0	0	0
74	12702276639	405034743	2021-05-31 17:24:49	2021-05-31 17:42:43	1	1	1	1	3	2	4		4		2		1	2	4	2	2	2	2	2	2	2	3	4	2	2	2	2	2	1	2	2	2	1	2	2	41	1	2	1	0	1	0	1	1
75	12702264306	405035993	2021-05-31 17:15:21	2021-05-31 17:35:19	1	1	2	2	3	2	2		2		1		1	1	2	1	5	4	4	3	3	1	2	2	2	4	5	5	5	2	3	3	4	4	3	5	69	1	1	1	0	1	0	0	0
76	12702258442	405035993	2021-05-31 17:15:11	2021-05-31 17:32:45	1	5	2	1	3	2	2		1		1	(B40): Bawah RM2000	1	1	1	4	3	2	2	4	2	3	2	2	1	2	2	2	1	3	1	4	3	1	2	2	44	1	1	1	0	2	1	0	0
77	12702242907	405035993	2021-05-31 17:07:40	2021-05-31 17:12:23	1	1	1	2	3	1	3		1		2		1	3	3	1	2	3	5	1	5	2	3	1	1	1	1	1	1	1	1	1	1	1	1	1	34	0	0	0	0	0	0	0	0
78	12702233519	405035993	2021-05-31 17:02:23	2021-05-31 17:11:29	1	4	2	2	1	2	2		2		1		1	1	1	1	4	2	2	1	2	1	1	1	5	2	3	3	2	3	2	3	4	3	2	1	47	1	1	0	0	0	0	0	1
79	12702222682	405035993	2021-05-31 16:55:42	2021-05-31 17:14:07	1	4	2	1	2	2	2		2		1		1	1	1	1	5	5	4	2	3	5	1	4	3	2	3	3	2	5	2	5	5	3	4	2	68	1	3	1	2	3	1	1	3
80	12702214555	405035993	2021-05-31 16:50:49	2021-05-31 17:00:40	1	4	2	1	1	2	4		3		2		1	1	1	1	3	4	2	1	4	2	2	2	4	4	2	1	2	4	2	4	2	1	2	1	49	1	1	1	1	1	1	0	0
81	12702212733	405035993	2021-05-31 16:50:16	2021-05-31 17:25:16	1	2	2	1	1	2	2		2		1	RM1000	1	3	0	4	1	2	1	1	1	2	2	1	1	1	1	3	1	1	1	1	2	1	1	1	26	0	1	0	0	1	0	0	0
82	12702207191	405035993	2021-05-31 16:45:09	2021-05-31 16:59:46	1	5	1	1	3	2	1		1		1		1	3	1	3	3	2	2	4	1	2	4	2	1	3	2	1	1	2	1	5	2	1	1	1	41	0	0	0	0	0	0	0	1
83	12702206314	405035993	2021-05-31 16:46:28	2021-05-31 17:27:41	1	5	2	2	3	2	2		1		2		1	1	3	3	2	2	2	2	2	2	2	2	2	2	2	2	2	2	2	2	2	2	2	2	40	2	0	1	1	1	1	1	1
84	12702201439	405035993	2021-05-31 16:43:55	2021-05-31 17:28:55	1	1	2	2	3	2	2		2		2		1	1	3	3	2	2	2	2	2	2	2	2	2	2	2	2	2	1	2	2	2	2	2	2	39	1	0	1	1	1	1	1	1
85	12702196471	405035993	2021-05-31 16:40:07	2021-06-01 11:43:08	1	2	2	1	1	2	5		4		3		1	3	0	3	2	2	2	1	2	1	2	0	1	1	1	1	1	1	1	2	2	1	2	1	27	0	1	1	0	1	0	0	1
86	12702193374	405035993	2021-05-31 16:38:39	2021-05-31 17:02:25	1	2	2	1	1	2	3		2		2		1	1	3	1	2	3	1	1	2	3	2	3	4	4	4	3	2	2	2	2	4	4	3	1	52	2	1	1	0	3	0	1	1
87	12702184549	405035993	2021-05-31 16:33:14	2021-05-31 16:51:00	1	3	1	1	1	2	2		5		2		1	1	3	3	4	4	4	2	2	1	3	1	2	1	1	1	1	2	1	4	1	1	1	1	38	0	0	0	0	0	0	0	0
88	12702156363	405035993	2021-05-31 16:16:49	2021-05-31 16:45:11	1	1	1	1	3	2	0	Sim tahap 3	0	Sim tahap 2	1		1	1	0	3	2	1	2	2	1	2	4	2	2	2	2	2	2	1	2	2	2	2	2	2	39	0	0	0	0	0	0	0	1
89	12702145832	405035993	2021-05-31 16:10:31	2021-05-31 16:19:10	1	3	2	1	1	2	4		5		3		2	1	1	3	3	4	2	1	2	2	1	2	2	4	2	3	2	4	1	3	2	3	2	1	46	3	1	1	2	3	2	2	3
90	12702144910	405035993	2021-05-31 16:09:00	2021-05-31 16:26:00	1	5	2	1	1	2	2		2		1		1	1	1	1	5	5	2	1	3	3	2	1	1	5	5	5	3	5	1	3	2	3	1	5	61	2	1	1	1	3	2	0	3
91	12702141518	405035993	2021-05-31 16:08:22	2021-05-31 16:33:32	1	1	2	1	3	2	3		2		1		1	1	2	2	1	1	1	2	1	2	1	1	1	2	1	1	1	3	1	1	2	0	1	1	25	0	0	1	0	0	0	0	1
92	12702136086	405035993	2021-05-31 16:04:58	2021-05-31 16:16:31	1	2	2	1	1	2	2		2		2		1	1	0	2	3	2	2	1	2	2	2	1	3	1	2	2	2	1	1	2	1	1	1	1	33	1	0	1	0	1	0	0	1
93	12702130454	405035993	2021-05-31 16:02:19	2021-05-31 16:14:55	1	2	2	1	1	2	2		2		2		1	1	3	2	2	3	3	1	4	3	2	1	2	3	3	2	2	2	1	3	1	3	1	3	45	1	1	0	0	2	1	1	0
94	12702125105	405035993	2021-05-31 15:59:25	2021-05-31 16:41:32	1	5	2	2	1	2	2		2		1		1	2	3	3	3	3	3	3	3	3	5	3	3	3	3	3	3	3	3	3	3	1	3	1	58	0	1	0	0	1	0	0	2
95	12702112370	405035993	2021-05-31 15:49:02	2021-05-31 16:04:11	1	5	2	1	1	2	3		3		2		1	1	1	4	2	2	2	1	2	2	1	3	3	5	3	2	2	2	2	5	3	3	2	2	49	3	1	2	0	2	1	0	1
96	12702106257	405035993	2021-05-31 15:47:25	2021-05-31 15:58:41	1	5	2	1	1	2	2		2		1		1	1	2	2	2	1	1	2	1	1	3	2	1	1	1	2	2	2	2	3	2	1	1	1	32	0	0	0	0	1	0	2	0
97	12702105119	405035993	2021-05-31 15:47:29	2021-05-31 16:00:40	1	5	2	1	1	2	2		2		1		1	3	2	2	2	2	2	1	1	4	1	4	2	1	2	4	1	1	1	3	2	1	3	1	39	1	0	2	0	1	0	0	0
98	12702104072	405035993	2021-05-31 15:46:36	2021-05-31 15:53:32	1	5	1	1	1	2	4		2		2		1	1	0	1	5	4	1	1	2	2	2	3	2	3	2	2	2	2	2	3	3	1	1	3	46	1	0	1	0	2	1	0	1
99	12702098495	405035993	2021-05-31 15:41:09	2021-05-31 16:22:46	1	1	1	1	3	2	4		4		3		1	1	0	0	5	3	4	4	5	2	2	3	2	5	5	4	4	2	4	5	4	2	4	5	74	2	2	1	2	3	2	3	2
100	12702096123	405035993	2021-05-31 15:41:29	2021-05-31 17:38:50	1	1	2	1	3	2	3		4		2		1	1	0	3	2	1	1	2	2	1	2	1	1	2	2	2	1	1	1	1	1	1	1	2	28	0	0	0	0	1	0	0	0
101	12702092112	405035993	2021-05-31 15:38:19	2021-05-31 16:01:47	1	1	2	2	3	1	3		3		1		1	1	0	1	5	5	5	5	5	2	1	2	5	3	5	3	1	1	2	5	5	2	5	2	69	3	0	0	0	2	0	0	1
102	12702089200	405035993	2021-05-31 15:37:39	2021-05-31 15:54:52	1	1	2	1	3	2	0	Sijil tinggi perakaunan	2		1		1	1	1	1	2	1	5	2	1	2	4	2	1	1	4	2	2	5	2	1	2	1	5	2	47	1	3	0	0	1	0	1	1
103	12702085243	405035993	2021-05-31 15:34:54	2021-05-31 15:58:37	1	3	2	1	1	2	3		5		3		1	1	0	2	5	2	2	1	2	2	2	2	2	3	2	1	2	1	2	5	4	1	2	2	45	1	2	1	0	1	0	0	2
104	12702081382	405035993	2021-05-31 15:32:52	2021-05-31 15:49:46	1	1	2	2	1	2	4		4		3		1	1	0	3	2	1	1	2	3	1	3	2	2	3	3	1	1	1	2	3	2	2	1	1	37	0	0	0	0	1	1	0	1
105	12702080991	405035993	2021-05-31 15:33:04	2021-05-31 15:57:58	1	1	2	3	1	1	3		5		1		2	1	0	3	4	2	1	2	1	1	3	2	1	2	2	2	1	1	2	1	3	3	2	1	37	1	1	0	0	1	0	0	0
106	12702054187	405035993	2021-05-31 15:17:02	2021-05-31 15:27:21	1	5	1	1	3	2	2		2		1		1	1	1	3	2	3	2	2	2	3	2	2	3	2	3	2	1	2	2	2	3	2	2	2	44	1	1	0	0	3	1	0	1
107	12702046045	405035993	2021-05-31 15:12:10	2021-05-31 15:26:28	1	1	2	2	1	2	4		4		3		4	1	0	3	2	2	3	3	2	1	4	2	1	2	3	4	3	2	1	2	1	1	2	1	42	0	0	0	0	1	0	0	1
108	12702037515	405035993	2021-05-31 15:06:41	2021-05-31 15:27:39	1	4	2	1	3	2	3		3		2		1	1	4	2	3	4	2	2	5	5	1	4	1	5	5	4	5	4	3	5	3	5	2	5	73	1	0	0	0	1	1	0	1
109	12702032002	405035993	2021-05-31 15:03:04	2021-05-31 15:21:00	1	5	2	2	2	2	1		2		1		1	2	0	2	4	5	3	1	3	2	1	2	4	3	3	2	1	1	2	2	4	3	2	1	49	1	0	0	0	3	1	0	1
110	12702031361	405035993	2021-05-31 15:03:02	2021-05-31 15:13:09	1	1	1	1	1	2	3		2		2		1	2	0	3	3	2	1	2	2	2	4	2	5	2	3	2	2	1	1	3	4	5	1	2	49	1	2	0	1	1	0	0	2
111	12702029083	405035993	2021-05-31 15:00:08	2021-05-31 15:17:42	1	1	1	1	3	2	3		3		1		1	2	1	3	2	1	1	1	1	1	2	2	1	2	2	2	2	2	2	2	2	2	1	1	32	0	1	1	0	0	0	0	2
112	12702028461	405035993	2021-05-31 14:59:03	2021-05-31 15:48:34	1	1	1	1	3	1	4		5		1		2	1	0	2	2	1	5	1	3	1	1	3	1	2	4	1	3	1	1	3	2	1	3	2	41	0	1	0	0	0	0	0	0
113	12702010396	405035993	2021-05-31 14:49:46	2021-05-31 15:05:29	1	3	2	1	3	2	3		0	sijil rendah pelajaran	2	Bawah RM5000	1	2	3	2	3	2	1	4	4	2	2	2	3	2	3	3	2	4	2	3	2	2	2	2	50	2	2	1	1	1	1	2	1
114	12702009125	405035993	2021-05-31 14:48:16	2021-05-31 14:57:11	1	3	1	1	3	2	4		4		2		1	1	1	1	3	1	1	2	1	2	3	2	5	3	3	3	4	5	3	3	3	5	3	4	59	1	2	0	1	3	2	2	2
115	12701999336	405035993	2021-05-31 14:42:32	2021-05-31 15:08:44	1	5	1	2	1	2	2		2		1	Rm3000	1	1	2	2	2	3	4	5	3	1	3	2	2	4	3	3	3	2	1	3	4	1	2	2	53	1	0	0	0	0	0	0	0
116	12701998495	405035993	2021-05-31 14:41:53	2021-05-31 14:52:36	1	3	2	1	1	2	0	sijil perniagaan	0	sijil kejuteraan elektrik kuasa	1		1	1	0	1	2	2	2	1	1	2	1	1	2	3	5	2	2	2	1	2	2	1	3	1	38	1	0	2	0	2	0	1	0
117	12701998176	405035993	2021-05-31 14:41:40	2021-05-31 14:55:23	1	4	2	1	1	2	2		2		1		1	1	0	2	4	3	1	3	2	2	2	2	2	4	3	3	2	1	2	3	3	2	2	2	48	1	0	0	1	1	1	1	2
118	12701997615	405035993	2021-05-31 14:41:10	2021-05-31 18:21:15	1	5	1	3	1	2	4		4		3		1	1	3	2	3	2	1	3	2	2	3	3	2	2	2	3	2	4	2	2	3	2	2	3	48	2	1	1	1	1	1	0	0
119	12701995918	405035993	2021-05-31 14:40:18	2021-05-31 14:48:25	1	3	2	1	1	2	2		2		1		3	1	3	2	2	2	2	3	1	2	2	1	1	2	5	2	2	2	1	2	2	1	2	2	39	0	0	0	0	0	0	0	0
120	12701985016	405035993	2021-05-31 14:32:22	2021-05-31 15:15:34	1	1	2	1	3	2	2		2		1		1	1	1	2	3	3	4	1	2	3	3	2	3	5	2	3	2	5	2	3	3	5	4	2	60	1	2	2	1	2	2	1	3
121	12701975091	405035993	2021-05-31 14:26:02	2021-05-31 14:42:23	1	1	2	1	2	2	2		2		1		1	1	2	3	2	2	4	1	2	2	4	2	3	3	2	5	1	1	1	2	3	1	1	2	44	0	1	0	0	0	0	0	1
122	12701970730	405035993	2021-05-31 14:23:30	2021-05-31 14:38:18	1	1	2	1	3	2	4		4		2		1	2	2	3	1	1	1	2	1	1	3	2	2	2	2	2	1	2	1	1	3	1	1	1	31	0	1	1	0	1	0	0	0
123	12701962286	405035993	2021-05-31 14:17:31	2021-06-01 16:13:17	1	2	2	2	3	2	2		2		1		1	1	3	3	2	1	2	2	2	1	1	1	1	1	2	3	2	2	2	2	2	1	1	2	33	2	1	1	0	1	1	1	1
124	12701961583	405035993	2021-05-31 14:17:14	2021-05-31 14:27:04	1	4	2	2	1	2	2		2		1		1	1	4	2	4	2	3	2	3	2	3	2	2	3	3	2	3	3	2	3	3	2	2	2	51	1	2	1	1	1	2	0	2
125	12701956057	405035993	2021-05-31 14:10:52	2021-05-31 14:47:51	1	1	1	1	1	2	4		4		3		2	3	0	4	2	3	1	4	3	1	2	1	1	3	2	1	3	1	1	1	2	1	1	1	35	1	0	1	1	3	1	0	2
126	12701945237	405035993	2021-05-31 14:06:00	2021-05-31 17:27:09	1	5	2	1	3	2	2		2		1		1	1	0	1	2	1	1	4	3	2	2	2	5	1	1	1	2	1	1	2	2	2	1	1	37	0	1	1	1	0	0	1	1
127	12701944377	405035993	2021-05-31 14:02:59	2021-05-31 15:08:44	1	4	2	1	3	2	3		4		2		3	1	0	3	2	2	3	1	1	2	2	1	5	1	5	5	5	4	2	5	4	1	5	4	60	1	3	0	0	0	0	1	1
128	12701909271	405035993	2021-05-31 13:40:38	2021-05-31 14:01:01	1	1	1	1	1	2	3		5		2		2	1	0	3	3	2	2	2	1	1	1	2	1	2	2	2	3	1	2	3	2	1	1	2	36	1	0	0	0	1	0	1	1
129	12701905069	405035993	2021-05-31 13:37:23	2021-05-31 13:46:13	1	2	1	1	3	1	2		2		1		1	1	4	2	2	2	2	1	2	2	1	2	1	2	2	2	1	1	1	2	1	1	2	1	31	0	2	0	0	0	1	1	1
130	12701904962	405035993	2021-05-31 13:36:35	2021-05-31 13:57:27	1	3	2	1	1	2	4		3		2		1	1	3	1	3	1	2	1	1	1	2	2	3	4	3	5	1	2	1	2	2	2	4	1	43	0	1	0	0	0	1	2	0
131	12701879779	405035993	2021-05-31 13:17:35	2021-05-31 13:37:40	1	2	2	1	3	2	2		4		2		1	3	2	1	2	2	2	2	2	1	2	2	2	2	2	1	1	2	1	2	2	2	1	1	34	2	1	0	1	1	2	2	1
132	12701873685	405035993	2021-05-31 13:13:05	2021-05-31 13:29:05	1	5	1	1	3	2	2		2		1		1	2	2	1	4	3	2	1	2	3	2	2	3	3	3	2	1	4	1	3	3	2	2	1	47	1	0	0	0	0	1	1	1
133	12701859144	405035993	2021-05-31 13:02:37	2021-05-31 13:17:43	1	4	2	1	1	2	4		5		1		1	1	3	2	3	3	2	1	2	2	2	3	2	2	2	2	2	2	1	3	3	1	2	1	41	1	0	1	0	2	1	0	1
134	12701859060	405035993	2021-05-31 13:01:52	2021-05-31 13:25:40	1	3	2	1	3	2	2		0	Institut Latihan Perindustrian (Sijil)	1		1	1	2	3	2	2	1	1	1	1	2	1	1	1	2	2	2	1	1	1	3	1	1	1	28	0	0	0	0	0	0	1	0
135	12701858406	405035993	2021-05-31 13:01:33	2021-05-31 13:18:41	1	5	2	1	2	2	3		2		1		1	1	1	1	2	3	1	2	3	3	2	4	3	5	4	3	1	3	1	5	5	2	1	2	55	1	2	0	1	2	1	0	0
136	12701856715	405035993	2021-05-31 13:00:35	2021-05-31 13:18:33	1	5	2	3	3	2	5		5		1	2000	1	1	2	3	2	2	1	1	2	2	2	3	1	3	2	3	3	3	2	2	3	1	1	1	40	1	0	0	0	1	0	0	1
137	12701814378	405035993	2021-05-31 12:28:03	2021-05-31 13:13:31	1	5	2	1	1	2	5		4		2		2	1	3	2	5	2	3	2	2	2	2	1	1	5	3	3	3	4	3	3	4	1	2	2	53	1	3	1	0	2	1	1	2
138	12701790297	405035993	2021-05-31 12:08:10	2021-05-31 12:20:47	1	5	2	3	1	2	2		2		1		2	3	0	4	2	2	3	1	1	1	2	1	1	2	2	1	2	1	1	2	1	0	1	2	29	0	0	1	0	1	0	1	1
139	12701786409	405035993	2021-05-31 12:06:08	2021-05-31 12:17:11	1	5	2	2	1	2	2		2		1		1	1	3	2	2	2	2	1	1	1	2	1	1	2	2	2	1	1	1	2	2	1	2	1	30	0	1	0	1	0	1	0	0
140	12701778204	405035993	2021-05-31 12:00:33	2021-05-31 12:20:10	1	4	2	2	1	2	3		3		1		1	1	4	4	3	2	1	2	2	3	2	3	2	4	2	2	2	3	2	3	2	2	1	2	45	1	2	0	0	1	0	0	2
141	12701775524	405035993	2021-05-31 11:58:27	2021-05-31 12:05:53	1	5	1	3	1	1	4		2		2		1	1	0	2	4	1	3	3	3	3	3	3	3	3	3	3	3	3	3	3	3	3	3	3	59	0	0	0	0	0	0	0	0
142	12701747533	405035993	2021-05-31 11:34:15	2021-05-31 11:48:26	1	4	1	3	1	2	2		2		3		2	2	4	1	5	3	5	2	5	4	1	2	1	3	5	1	4	1	3	5	3	1	1	1	56	0	1	0	0	0	1	0	0
143	12701746801	405035993	2021-05-31 11:37:01	2021-05-31 11:45:05	1	5	1	1	1	2	4		4		2		1	1	1	1	3	2	1	3	2	2	3	2	2	2	2	2	2	2	1	2	2	3	2	2	42	1	1	1	1	0	1	1	1
144	12701734677	405035993	2021-05-31 11:28:09	2021-05-31 11:44:51	1	4	2	2	1	2	4		4		2		1	1	2	1	5	3	2	2	4	2	2	2	2	3	3	3	3	2	1	4	3	3	3	1	53	1	2	1	1	2	0	1	0
145	12701726892	405035993	2021-05-31 11:21:45	2021-05-31 11:35:38	1	4	2	1	1	2	2		2		1		1	1	2	3	4	3	3	2	2	5	2	3	3	3	2	2	2	4	2	5	4	4	3	2	60	1	1	1	1	2	2	0	1
146	12701719168	405035993	2021-05-31 11:17:02	2021-05-31 11:25:23	1	5	2	2	1	1	4		3		1		1	1	1	1	4	5	2	3	5	3	2	4	3	5	4	2	1	3	3	5	5	2	3	1	65	0	3	0	0	1	1	1	1
147	12701718975	405035993	2021-05-31 11:16:21	2021-05-31 11:33:19	1	4	2	1	1	2	2		2		1		1	2	3	4	2	1	3	1	2	1	1	1	2	4	2	4	1	3	1	4	3	1	1	0	38	1	1	0	2	2	0	0	0
148	12701716030	405035993	2021-05-31 11:14:50	2021-05-31 11:21:04	1	4	2	3	1	2	5		5		2		2	2	1	4	2	2	2	3	2	3	2	2	3	3	2	2	3	3	3	2	2	2	2	2	47	1	3	1	0	0	2	0	1
149	12701715005	405035993	2021-05-31 11:13:52	2021-05-31 11:20:47	1	5	1	2	1	2	2		2		1		1	1	4	3	4	3	4	4	3	2	3	3	5	3	4	2	3	2	2	4	3	2	1	1	58	0	2	0	0	2	0	0	0
150	12701686088	405035993	2021-05-31 10:52:52	2021-05-31 11:23:41	1	4	1	1	1	2	4		5		3		1	1	3	1	5	3	2	2	3	2	2	2	5	5	4	5	1	1	1	2	3	4	1	3	56	3	1	2	0	1	0	0	0
151	12701685773	405035993	2021-05-31 10:52:09	2021-05-31 11:05:29	1	4	2	1	1	2	4		4		3		2	1	0	2	2	1	1	2	1	1	2	2	2	1	1	1	2	1	1	2	2	1	1	1	28	1	1	1	0	1	2	1	2
152	12701684734	405035993	2021-05-31 10:52:12	2021-05-31 11:03:56	1	4	2	1	1	2	4		3		1		1	1	1	1	2	3	2	2	2	2	2	2	1	3	2	3	2	2	1	2	2	1	1	1	38	1	0	0	0	2	1	0	1
153	12701684403	405035993	2021-05-31 10:51:59	2021-05-31 11:05:18	1	5	1	2	1	1	0	Maktab Perguruan	1		2		4	2	2	1	1	2	4	3	5	2	1	2	3	2	4	4	1	4	3	4	2	2	2	2	53	0	2	0	0	0	0	0	1
154	12701677949	405035993	2021-05-31 10:47:35	2021-05-31 11:01:31	1	5	2	1	1	2	2		2		1		1	2	1	1	3	2	2	3	2	2	1	2	1	3	1	2	2	4	1	2	2	2	1	2	40	0	2	1	0	1	1	1	0
155	12701676602	405035993	2021-05-31 10:46:35	2021-05-31 11:10:37	1	5	2	1	1	2	0	Tingkatan 6	3		1		1	3	4	4	2	1	1	1	1	1	2	1	1	1	1	2	1	1	1	1	2	1	1	1	24	0	1	0	0	0	0	1	1
156	12701666038	405035993	2021-05-31 10:38:38	2021-05-31 10:48:51	1	5	2	2	1	2	3		5		2		1	2	0	2	2	1	1	1	1	1	1	1	1	2	1	1	1	1	1	2	1	1	1	1	23	0	1	0	0	0	0	0	0
157	12701662660	405035993	2021-05-31 10:37:07	2021-05-31 10:45:49	1	4	1	1	1	2	4		3		2		1	2	0	1	4	3	1	1	1	4	1	3	3	3	2	2	2	1	1	1	1	1	2	1	38	2	1	2	1	2	2	0	2
158	12701656003	405035993	2021-05-31 10:32:49	2021-05-31 10:48:27	1	5	2	2	1	2	4		4		2		1	1	2	1	5	2	4	2	2	3	4	3	2	4	4	5	2	3	4	5	5	2	2	3	66	1	3	1	1	2	2	2	3
159	12701650775	405035993	2021-05-31 10:28:59	2021-05-31 11:31:09	1	4	2	2	1	2	3		2		1		1	1	1	1	5	4	4	2	4	3	3	4	4	3	4	4	4	4	4	5	4	3	4	4	76	2	2	1	1	1	1	1	1
160	12701650216	405035993	2021-05-31 10:28:23	2021-05-31 10:42:29	1	1	2	1	1	2	3		3		1		1	1	0	3	4	2	1	1	1	1	4	2	2	2	1	2	1	1	1	2	2	1	1	1	33	0	0	0	0	0	0	1	1
161	12701649543	405035993	2021-05-31 10:28:29	2021-05-31 10:36:05	1	4	2	3	1	2	4		4		2		1	1	4	4	3	2	2	1	2	3	4	4	3	4	3	3	2	3	2	2	2	2	2	2	51	1	2	2	1	3	2	1	2
162	12701649072	405035993	2021-05-31 10:27:12	2021-05-31 11:19:38	1	4	2	2	1	2	4		2		2		1	1	1	2	3	2	2	1	2	2	3	2	2	2	2	2	1	2	2	3	2	2	3	1	41	0	1	0	0	1	0	0	1
163	12701620864	405035993	2021-05-31 10:11:30	2021-05-31 10:25:50	1	1	1	2	1	1	2		0	No Father	1		1	2	1	1	3	3	5	3	2	3	3	3	3	3	3	3	3	3	3	3	3	4	3	3	62	0	0	1	1	1	1	1	1
164	12701539783	405035993	2021-05-31 09:08:51	2021-05-31 10:14:54	1	2	1	2	1	1	2		1		1		1	1	0	2	4	3	1	1	1	1	3	3	1	1	4	3	1	3	4	3	1	1	1	1	41	1	1	1	0	1	0	0	1
165	12701539005	405035993	2021-05-31 09:07:57	2021-05-31 09:28:36	1	5	2	1	2	2	0	Mak =sekolah menegah	0	Mak =sekolah menegah .Ayah =univeriti	1		4	1	1	1	5	2	1	1	1	3	1	2	1	2	2	1	2	2	1	4	3	2	4	2	42	0	0	2	0	1	1	1	1
166	12701457757	405035993	2021-05-31 08:01:06	2021-05-31 08:18:37	1	1	1	2	2	2	0	Sihat	0	Sihat	1	below RM 1000	1	1	1	1	5	5	4	1	5	3	3	1	4	1	1	1	2	1	1	4	1	1	3	3	50	0	0	3	0	1	1	0	0
167	12701428613	405035993	2021-05-31 07:41:30	2021-05-31 07:51:07	1	5	2	1	2	2	2		2		2		1	1	2	3	2	2	3	1	2	1	2	2	2	3	1	1	2	2	1	1	2	2	5	1	38	0	0	0	0	1	0	0	1
168	12701089481	405035993	2021-05-31 02:07:07	2021-05-31 02:13:43	1	5	1	1	2	2	2		2		1		1	1	1	4	3	5	2	2	5	2	2	2	2	2	2	2	2	2	2	2	2	2	2	2	47	1	1	1	1	1	1	1	1
169	12701049250	405035993	2021-05-31 01:24:04	2021-05-31 01:32:14	1	4	2	1	2	2	3		4		2		1	3	4	4	2	3	2	2	1	2	2	2	2	4	2	2	2	2	1	2	2	2	2	1	40	1	0	0	1	2	0	1	0
170	12700907144	405034743	2021-05-30 23:00:51	2021-05-30 23:37:30	1	2	2	1	2	2	3		2		2		1	1	0	1	2	1	3	1	2	5	1	2	1	1	1	1	1	1	1	1	2	1	1	1	30	0	0	0	0	1	1	0	0
171	12700795370	405035993	2021-05-30 21:13:09	2021-05-30 21:26:32	1	2	1	1	2	2	2		2		2		1	3	0	3	2	1	2	2	1	1	1	2	1	1	2	1	2	1	1	2	2	1	2	1	29	0	0	0	0	0	0	0	1
172	12700771625	405035993	2021-05-30 20:48:06	2021-05-30 21:15:24	1	5	2	1	2	2	2		2		1	Rm 800	1	2	3	3	4	2	2	1	1	2	2	1	1	2	2	1	1	2	1	1	1	3	1	1	32	0	1	0	0	0	0	0	0
173	12700757069	405035993	2021-05-30 20:34:09	2021-05-30 20:44:01	1	5	2	1	2	2	2		2		1		1	1	1	1	5	3	2	3	2	3	4	3	1	2	2	3	2	4	2	4	3	1	2	2	53	1	1	1	1	2	1	1	2
174	12700756322	405035993	2021-05-30 20:32:33	2021-05-30 20:45:44	1	4	2	1	1	2	2		2		1		1	1	1	1	4	3	2	4	3	2	5	1	2	2	3	2	2	3	1	3	3	1	1	2	49	1	1	1	0	1	1	1	0
175	12700756089	405035993	2021-05-30 20:32:44	2021-05-31 07:05:59	1	1	1	1	2	2	3		2		1		1	1	3	2	4	2	1	1	2	2	1	2	1	3	4	2	2	4	1	3	4	5	1	3	48	1	1	0	2	2	0	1	3
176	12700756032	405035993	2021-05-30 20:31:25	2021-05-30 20:55:53	1	4	2	1	2	2	4		4		2		1	1	2	1	5	2	2	2	3	3	2	4	4	3	2	3	4	3	2	5	4	5	3	2	63	1	1	2	1	3	1	1	1
177	12700727201	405035993	2021-05-30 20:02:10	2021-05-30 20:20:27	1	2	2	1	2	2	2		2		1		1	1	3	1	4	2	2	4	3	4	2	2	2	2	2	3	3	2	4	1	2	2	2	2	50	1	0	0	0	0	1	1	1
178	12700717056	405035993	2021-05-30 19:50:29	2021-05-30 20:03:30	1	1	1	1	2	2	2		2		1		1	1	1	2	3	2	2	2	3	2	4	2	2	2	2	3	2	4	2	3	2	2	2	1	47	1	1	1	0	0	0	0	0
179	12700705469	405035993	2021-05-30 19:25:22	2021-05-30 22:12:51	1	4	1	1	1	2	2		5		2		3	1	1	2	4	2	2	2	2	2	2	2	1	2	3	3	1	3	2	5	3	2	2	2	47	1	0	1	0	1	1	0	1
180	12700704883	405035993	2021-05-30 19:37:19	2021-05-30 19:45:34	1	5	2	1	2	2	2		2		1		1	1	1	1	5	4	3	2	1	2	1	1	1	1	4	4	5	5	4	5	4	1	4	1	58	0	3	0	0	0	0	0	2
181	12700703015	405035993	2021-05-30 19:35:11	2021-05-30 19:41:41	1	4	2	1	2	2	2		2		1		1	1	1	1	3	4	2	2	2	4	1	3	1	3	3	4	2	5	2	3	4	3	2	2	55	2	3	2	3	2	1	1	2
182	12700702521	405035993	2021-05-30 19:34:24	2021-05-31 23:51:19	1	5	2	1	2	2	2		2		1		1	1	1	1	3	3	3	2	2	2	2	2	2	2	2	2	1	2	1	2	2	1	5	1	42	0	1	1	0	2	1	0	1
183	12700698964	405035993	2021-05-30 19:30:16	2021-05-30 19:43:21	1	5	2	1	2	2	3		3		1		1	1	1	1	4	4	2	2	1	3	2	3	2	2	3	3	3	4	2	4	4	2	4	2	56	2	0	1	1	2	1	3	2
184	12700698030	405035993	2021-05-30 19:29:35	2021-05-30 19:40:23	1	1	1	1	2	2	0	Tak sekolah	1		1	550	1	2	3	3	2	4	1	2	5	1	2	1	2	1	2	2	1	1	1	2	3	2	1	1	37	1	0	0	0	0	0	1	0
185	12700685020	405035993	2021-05-30 19:12:49	2021-05-30 19:31:12	1	2	1	1	2	2	2		2		1		1	2	4	2	3	2	1	1	4	2	1	2	1	2	3	2	1	1	1	2	3	1	1	1	35	0	1	0	0	1	0	0	0
186	12700604833	405035993	2021-05-30 17:43:44	2021-05-30 17:53:55	1	5	2	1	1	2	5		5		3		1	1	2	1	2	2	1	2	3	2	5	4	5	4	4	3	3	4	2	4	2	3	3	2	60	0	1	0	0	2	0	0	1
187	12700582388	405035993	2021-05-30 17:19:04	2021-05-30 17:34:58	1	3	2	1	2	2	0	Tid	1		1		1	1	2	3	2	1	1	1	2	2	1	1	1	5	5	5	2	2	0	5	2	1	1	1	41	3	3	0	3	3	0	0	3
188	12700570161	405035993	2021-05-30 17:04:10	2021-05-30 17:16:00	1	2	2	1	2	2	1		2		1		1	3	0	2	2	2	4	1	2	1	1	1	1	1	1	1	1	1	1	2	1	1	1	1	27	0	1	1	0	0	0	0	0
189	12700557614	405035993	2021-05-30 16:52:29	2021-05-30 17:29:28	1	4	2	1	2	1	5		4		3		2	2	4	1	2	2	4	2	1	2	2	1	1	4	1	4	1	2	1	3	2	1	1	4	41	0	0	0	1	0	0	0	0
190	12700549189	405035993	2021-05-30 16:42:03	2021-05-30 17:03:45	1	4	1	1	2	2	2		2		1		1	1	1	1	5	2	5	5	2	2	1	2	5	5	3	2	1	5	2	5	5	5	5	5	72	1	0	1	3	3	1	3	1
191	12700549085	405035993	2021-05-30 16:42:36	2021-05-30 16:56:17	1	1	2	1	2	2	2		2		2		1	1	1	3	2	2	1	1	1	1	3	2	2	2	1	1	1	1	1	1	1	1	1	1	27	0	0	0	0	0	0	0	0
192	12700487911	405035993	2021-05-30 16:06:12	2021-05-30 16:21:44	1	3	2	1	1	1	1		1		2	RM7910.00	1	1	2	1	5	2	5	1	1	3	1	3	1	5	5	2	1	3	3	3	4	1	5	4	58	2	0	1	1	3	2	3	3
193	12700483546	405035993	2021-05-30 16:01:57	2021-05-30 16:09:47	1	2	2	1	2	2	2		2		1		1	1	2	1	4	2	3	2	4	1	3	2	2	2	4	2	2	2	3	4	4	1	3	2	52	1	1	0	0	1	1	2	2
194	12700458653	405035993	2021-05-30 15:30:47	2021-05-30 15:55:08	1	3	2	1	2	2	3		2		1		2	1	0	3	2	2	1	1	2	2	1	2	2	2	2	1	2	2	2	2	2	2	1	2	35	1	1	1	0	1	1	0	1
195	12700445804	405035993	2021-05-30 15:16:54	2021-05-30 15:33:43	1	1	2	1	2	2	2		2		1		1	1	1	1	5	2	5	2	1	2	1	1	1	2	1	2	2	2	1	2	2	1	5	1	41	0	2	1	0	0	1	0	1
196	12700444817	405035993	2021-05-30 15:15:53	2021-05-30 15:30:36	1	2	2	1	2	2	2		3		2		2	1	4	3	1	1	2	2	1	1	5	1	1	3	1	4	1	1	1	1	2	1	2	1	33	0	1	0	0	0	1	0	0
197	12700443546	405035993	2021-05-30 15:12:04	2021-05-30 15:30:06	1	5	2	1	1	2	3		3		1		1	1	1	2	4	2	2	4	2	2	2	2	2	4	4	3	4	4	2	4	2	2	2	4	57	1	1	2	2	2	2	3	1
198	12700443131	405035993	2021-05-30 15:13:39	2021-05-30 15:20:41	1	1	2	1	1	2	4		3		2		1	1	4	1	3	2	2	2	3	2	3	2	2	3	3	5	5	3	3	5	5	5	5	3	66	2	1	2	1	2	1	1	2
199	12700437006	405035993	2021-05-30 15:06:32	2021-05-30 15:22:21	1	2	2	1	2	2	3		3		1		1	1	1	1	5	3	3	2	4	3	2	3	2	3	4	4	4	3	2	3	3	2	3	4	62	2	1	1	2	2	2	1	2
200	12700436582	405035993	2021-05-30 15:06:22	2021-05-30 15:19:25	1	1	1	1	2	2	1		2		1	500	1	2	2	2	2	2	2	4	5	2	2	4	2	5	2	4	2	1	2	4	2	2	4	2	55	1	1	1	0	1	0	0	1
201	12700422998	405035993	2021-05-30 14:50:29	2021-05-30 16:25:45	1	3	2	1	3	2	0	Sijil pembantu jururawat	2		1		1	1	0	1	3	3	3	2	2	2	2	2	2	2	3	3	2	2	2	3	2	2	2	1	45	0	1	0	0	0	0	0	0
202	12700420124	405035993	2021-05-30 14:48:15	2021-05-30 14:53:50	1	1	2	1	1	2	3		3		2		1	1	1	1	5	3	5	5	5	5	5	5	1	2	2	1	1	4	3	5	5	1	5	1	69	0	1	1	0	2	1	0	0
203	12700418687	405035993	2021-05-30 14:45:35	2021-05-30 17:04:31	1	4	2	1	2	2	2		2		1	1300	1	3	3	3	1	2	1	2	3	2	1	1	1	2	1	2	2	2	1	2	2	2	1	1	32	1	2	2	0	1	1	1	1
204	12700415165	405035993	2021-05-30 14:40:38	2021-05-30 14:59:40	1	4	2	3	2	2	2		2		2		1	1	0	3	2	2	2	1	1	1	1	2	1	1	1	2	1	1	1	2	1	1	1	1	26	0	2	0	0	0	0	0	0
205	12700412733	405035993	2021-05-30 14:38:08	2021-05-30 14:46:08	1	5	2	1	2	2	4		4		3		1	1	4	2	2	2	1	1	2	1	1	1	1	2	1	1	2	3	1	2	2	1	2	1	30	0	2	1	0	1	1	1	1
206	12700402361	405035993	2021-05-30 14:25:14	2021-05-30 16:08:21	1	1	2	3	1	2	2		2		1		1	2	0	4	3	1	3	2	3	1	1	4	3	3	2	2	3	2	3	5	2	2	2	4	51	1	1	0	0	0	1	0	0
207	12700393788	405035993	2021-05-30 14:14:27	2021-05-31 09:43:04	1	1	1	2	2	2	2		1		1		1	1	2	3	1	1	1	1	1	1	1	1	1	1	1	1	1	1	1	1	1	1	1	1	20	0	0	0	0	0	0	0	0
208	12700392758	405035993	2021-05-30 14:13:14	2021-05-30 14:22:17	1	2	2	1	2	2	2		2		1		1	1	0	1	2	2	1	2	1	2	4	1	1	5	2	1	1	1	2	1	2	1	1	1	34	0	1	0	0	3	0	0	0
209	12700390790	405035993	2021-05-30 14:09:32	2021-05-30 14:21:10	1	2	2	1	2	2	3		4		1		1	1	0	0	1	2	1	2	1	2	2	2	1	1	1	2	1	1	1	1	2	1	1	1	27	1	2	1	1	2	1	0	0
210	12700388752	405035993	2021-05-30 14:08:17	2021-05-30 14:21:15	1	5	2	1	2	2	2		2		1		1	1	3	2	3	2	2	4	3	3	2	2	2	4	4	4	3	4	2	4	5	2	2	1	58	0	3	1	2	1	2	1	2
211	12700388016	405035993	2021-05-30 14:07:21	2021-05-30 21:40:33	1	3	1	1	2	2	3		2		1		1	3	0	4	2	2	1	2	2	1	2	2	1	1	1	2	1	1	1	1	1	1	1	1	27	0	0	0	0	0	0	0	0
212	12700379467	405035993	2021-05-30 13:57:38	2021-05-30 18:57:44	1	1	1	1	2	2	2		3		1		1	1	1	2	2	2	2	1	2	2	2	2	2	2	2	2	2	2	2	2	2	2	3	4	42	1	2	1	0	2	3	1	3
213	12700372831	405035993	2021-05-30 13:51:33	2021-05-30 14:37:28	1	3	2	1	2	2	4		3		2		1	1	1	3	2	1	1	2	1	3	1	1	1	2	2	1	2	3	2	3	2	1	1	1	33	0	0	0	1	1	0	1	0
214	12700370779	405035993	2021-05-30 13:49:22	2021-05-30 14:00:32	1	3	2	2	2	2	4		4		3		1	1	0	1	3	2	2	2	2	2	1	1	2	2	2	1	1	2	2	3	2	3	1	1	37	1	0	1	0	1	0	0	0
215	12700370341	405035993	2021-05-30 13:47:59	2021-05-30 16:23:02	1	5	2	1	2	2	1		1		1		1	1	3	1	3	2	2	1	5	3	5	1	1	2	3	2	2	3	1	5	5	1	2	1	50	0	0	1	0	0	0	0	0
216	12700361483	405035993	2021-05-30 13:39:37	2021-05-30 13:52:27	1	4	2	1	2	2	4		2		3		1	1	1	1	3	1	2	1	1	4	1	3	1	5	1	1	1	2	2	5	5	1	3	1	44	0	1	1	0	2	2	1	1
217	12700360973	405035993	2021-05-30 13:40:00	2021-05-30 13:58:07	1	3	1	1	2	2	3		2		1		1	3	0	4	4	2	1	2	2	2	4	2	1	0	0	2	2	2	2	2	2	2	2	2	38	1	1	1	1	1	1	1	1
218	12700359047	405035993	2021-05-30 13:37:12	2021-05-30 13:54:05	1	4	2	1	2	2	4		5		2		1	1	3	1	4	4	2	2	3	3	3	2	1	2	2	1	1	3	2	4	5	2	1	1	48	1	2	1	2	1	1	1	2
219	12700358978	405035993	2021-05-30 13:38:14	2021-05-30 13:45:19	1	1	2	1	2	2	4		5		2		1	3	3	2	2	5	4	1	3	3	2	3	1	3	5	3	1	1	2	5	1	2	5	1	53	1	2	1	1	1	3	3	1
220	12700348679	405035993	2021-05-30 13:33:19	2021-05-30 13:48:45	1	2	1	1	2	2	2		2		1		1	1	1	1	3	2	2	1	3	2	3	1	3	3	1	1	1	2	2	3	1	3	3	1	41	1	1	0	0	1	0	0	1
221	12700348380	405035993	2021-05-30 13:32:11	2021-05-30 13:44:22	1	2	2	1	2	2	2		2		1		1	1	0	1	4	4	2	3	4	4	3	4	2	5	2	2	2	1	1	2	3	2	2	2	54	1	1	1	2	3	1	2	3
222	12700347451	405035993	2021-05-30 13:32:59	2021-05-30 13:46:38	1	1	2	1	2	2	2		2		1	RM800	1	1	1	1	1	1	2	2	1	1	2	1	1	2	2	1	1	2	2	2	1	1	2	1	29	1	0	0	0	1	0	1	0
223	12700341468	405035993	2021-05-30 13:30:45	2021-05-30 13:44:40	1	3	1	1	2	2	3		3		2		1	2	2	2	3	2	3	2	5	2	5	2	2	3	3	2	3	2	1	3	2	1	2	2	50	0	1	0	1	0	0	0	0
224	12700335786	405035993	2021-05-30 13:30:29	2021-05-30 13:56:25	1	2	2	1	2	2	3		3		2		4	1	0	4	2	2	1	2	2	1	3	1	2	2	2	1	1	1	1	2	1	1	1	1	30	0	1	0	0	1	0	0	1
225	12700322789	405035993	2021-05-30 13:25:27	2021-05-30 13:49:50	1	3	2	1	2	1	3		2		1		1	1	1	1	5	5	5	5	5	5	3	5	5	1	5	5	4	2	2	5	5	5	1	1	79	1	1	1	0	1	1	0	1
226	12700321829	405035993	2021-05-30 13:17:11	2021-05-30 13:45:32	1	2	2	1	2	2	3		2		1		1	2	0	2	2	2	1	1	1	1	2	1	1	1	1	1	1	1	1	2	1	1	1	1	24	0	1	0	0	1	1	1	0
227	12700317612	405035993	2021-05-30 13:21:53	2021-05-30 13:41:53	1	2	2	1	2	2	0	SRP	2		1		1	1	4	3	3	0	5	2	3	2	3	2	5	1	5	2	2	3	1	1	1	1	5	1	48	0	0	3	2	2	1	3	3
228	12700315667	405035993	2021-05-30 13:19:22	2021-05-31 09:44:10	1	1	1	2	2	2	2		1		1		1	1	3	3	5	1	2	1	2	2	1	1	2	1	1	1	1	1	1	1	1	1	1	1	28	0	0	0	0	0	0	0	0
229	12700315279	405035993	2021-05-30 13:19:26	2021-05-30 13:34:48	1	5	2	1	2	2	2		2		1		1	1	1	2	3	1	2	2	4	2	2	1	1	4	2	4	2	2	1	4	4	1	1	2	45	1	1	1	0	1	1	1	2
230	12700315090	405035993	2021-05-30 13:19:33	2021-05-30 13:27:13	1	5	2	1	2	2	3		2		1		1	1	1	3	2	2	2	3	1	2	5	2	3	5	2	1	1	1	1	2	5	1	2	1	44	1	3	1	1	2	1	1	1
231	12700314014	405035993	2021-05-30 13:17:10	2021-05-30 13:31:08	1	5	2	1	2	2	3		3		1	RM1600	1	1	0	2	2	2	1	1	1	2	2	3	1	2	1	1	1	2	1	2	2	3	2	1	33	0	0	0	0	0	0	1	2
232	12700312650	405035993	2021-05-30 13:14:14	2021-05-30 14:13:39	1	5	1	2	2	2	2		2		1		1	1	1	3	2	4	2	1	4	3	2	1	2	2	3	3	4	3	2	1	3	5	1	1	49	1	1	1	1	2	1	0	0
233	12700309927	405035993	2021-05-30 13:12:43	2021-05-30 13:24:57	1	1	2	1	2	2	2		2		1	Berniaga	1	1	3	4	2	1	1	1	1	2	2	3	1	3	2	1	1	3	2	2	1	1	1	1	32	0	3	2	0	3	2	3	2
234	12700303769	405035993	2021-05-30 13:05:55	2021-05-30 13:15:37	1	5	2	1	2	2	2		3		1		1	1	4	2	4	3	2	4	2	3	2	2	2	2	2	2	2	3	1	3	4	1	2	1	47	1	0	0	1	1	0	0	0
235	12700301715	405035993	2021-05-30 13:03:29	2021-05-30 13:17:25	1	4	1	1	2	2	2		2		1		1	1	0	3	3	2	1	2	1	2	1	3	1	2	2	2	2	2	2	3	2	1	1	2	37	1	1	1	0	1	2	2	1
236	12700300899	405035993	2021-05-30 13:03:28	2021-05-30 13:11:50	1	4	1	1	2	2	2		2		1	1500 kebawah	1	4	0	0	3	2	4	1	1	2	1	3	1	2	1	2	2	2	2	2	2	1	2	1	37	1	3	1	2	1	1	1	1
237	12700298922	405035993	2021-05-30 13:01:08	2021-05-30 13:17:35	1	4	1	1	2	2	3		2		2		1	1	4	4	2	2	1	2	2	1	3	1	1	3	1	1	4	2	1	2	2	1	1	1	34	0	1	0	0	0	0	1	1
238	12700297482	405035993	2021-05-30 12:58:45	2021-05-30 13:14:27	1	5	2	4	2	2	2		2		1		1	2	0	4	3	1	3	1	2	2	2	4	2	2	2	1	1	1	1	2	2	2	2	1	37	2	1	1	0	1	0	1	1
239	12700296645	405035993	2021-05-30 12:58:48	2021-05-30 13:17:41	1	5	2	1	2	2	2		2		0	Tidak berkerja	1	1	4	4	2	2	1	1	2	2	2	3	1	2	1	2	1	1	1	2	1	1	1	1	30	0	0	0	1	1	0	0	0
240	12700291280	405035993	2021-05-30 12:54:04	2021-05-30 13:04:11	1	1	2	1	2	2	2		2		1		1	2	3	3	2	1	1	1	4	1	2	1	1	1	1	1	1	1	1	1	1	1	1	1	25	0	0	0	0	0	0	0	0
241	12700290383	405035993	2021-05-30 12:52:49	2021-05-30 13:31:03	1	5	2	1	2	2	2		2		1		1	1	1	1	5	2	1	3	2	2	2	1	2	3	2	2	1	3	1	3	2	1	1	1	40	0	2	0	0	1	0	1	1
242	12700286550	405035993	2021-05-30 12:46:51	2021-05-30 12:59:53	1	2	2	1	2	2	4		4		2		1	1	1	3	2	2	2	2	1	2	2	1	3	3	4	5	3	5	2	3	5	1	1	5	54	2	3	1	1	1	3	2	3
243	12700286344	405035993	2021-05-30 12:48:01	2021-05-30 13:14:08	1	2	2	1	2	2	2		2		1	RM1500	1	2	3	2	4	4	3	1	2	2	2	2	2	2	2	2	1	3	2	4	3	1	2	2	46	1	1	1	0	1	1	0	0
244	12700285061	405035993	2021-05-30 12:46:32	2021-05-30 12:56:13	1	5	2	1	2	2	2		2		1		1	1	3	2	3	2	2	1	2	2	1	2	2	2	2	2	1	2	1	3	3	1	4	1	39	0	0	0	0	0	0	0	1
245	12700285000	405035993	2021-05-30 12:46:18	2021-05-30 13:08:34	1	2	1	1	2	2	2		3		1	Bawah RM1000	1	1	1	2	1	4	2	2	4	3	2	3	5	5	4	2	2	5	1	1	1	1	3	1	52	0	3	3	1	2	1	1	1
246	12700283446	405035993	2021-05-30 12:43:29	2021-05-30 12:52:42	1	5	2	1	2	2	4		2		2		1	1	1	1	5	5	2	4	3	2	1	1	4	5	2	4	2	5	4	5	5	1	3	2	65	2	0	2	1	3	3	1	3
247	12700279591	405035993	2021-05-30 12:40:23	2021-05-30 14:23:50	1	1	2	1	2	1	0	Sijil Politeknik	2		1		1	1	3	3	3	2	2	1	3	1	3	2	1	1	2	3	2	1	1	2	2	1	2	1	36	0	0	0	1	1	0	1	0
248	12700274883	405035993	2021-05-30 12:34:19	2021-05-30 12:49:39	1	5	2	1	2	2	3		2		2		1	1	1	1	2	2	1	3	4	3	2	2	1	2	2	1	2	2	1	1	1	1	1	1	35	0	0	1	0	0	0	0	1
249	12700273864	405035993	2021-05-30 12:33:44	2021-05-30 12:45:25	1	3	2	1	2	1	1		2		1		1	1	3	1	5	2	1	1	1	2	2	2	2	2	5	3	3	2	1	5	4	1	2	4	50	0	1	0	2	0	0	2	0
250	12700270363	405035993	2021-05-30 12:29:37	2021-05-30 12:51:43	1	5	2	1	2	1	1		1		1		1	2	2	1	4	2	4	2	2	2	2	2	1	3	3	4	2	3	1	3	3	4	4	5	56	1	0	0	1	1	1	2	2
251	12700270018	405035993	2021-05-30 12:29:47	2021-05-30 12:41:07	1	3	1	1	2	2	3		2		2		1	1	0	3	3	2	3	1	1	2	2	2	1	2	1	2	2	1	1	1	1	2	1	2	33	0	0	0	0	1	0	0	0
252	12700269219	405035993	2021-05-30 12:28:43	2021-05-30 12:42:31	1	4	2	1	2	2	2		2		1		1	1	1	1	5	2	2	2	2	2	2	2	2	5	5	2	2	2	1	5	3	1	1	5	53	1	1	1	2	1	1	1	2
253	12700268620	405035993	2021-05-30 12:28:04	2021-05-30 12:44:00	1	5	2	1	1	2	2		2		3		1	1	2	2	2	3	2	1	2	3	4	2	4	3	2	4	1	1	2	4	2	1	1	4	48	0	1	2	0	2	1	2	0
254	12700266208	405035993	2021-05-30 12:25:25	2021-05-30 12:40:56	1	1	2	1	2	2	3		2		1		1	2	0	2	3	2	2	1	3	3	1	2	1	1	2	4	5	2	1	2	3	1	2	1	42	0	0	1	1	0	0	0	2
255	12700264697	405035993	2021-05-30 12:23:38	2021-05-30 12:34:58	1	5	2	1	2	2	5		2		2		1	1	4	3	2	1	1	2	1	2	1	2	2	3	2	2	1	2	2	2	3	1	2	1	35	0	0	0	0	1	1	0	1
256	12700264550	405035993	2021-05-30 12:23:54	2021-05-30 14:27:01	1	5	2	1	2	2	4		5		2		1	1	2	2	2	2	1	1	1	2	3	3	4	3	2	1	2	2	2	2	2	1	1	1	38	0	1	0	0	1	0	0	0
257	12700262669	405035993	2021-05-30 12:22:03	2021-05-30 12:34:09	1	4	2	1	2	2	2		2		1		1	1	3	3	2	2	2	2	2	2	4	2	2	2	1	2	2	2	2	2	2	2	2	2	41	1	1	1	0	1	1	1	1
258	12700261401	405035993	2021-05-30 12:20:37	2021-05-30 12:27:26	1	5	2	1	2	2	5		4		2		1	1	3	3	2	2	2	1	2	1	4	2	1	1	1	1	2	1	1	1	1	1	2	1	30	1	0	1	0	1	0	0	1
259	12700260605	405035993	2021-05-30 12:19:47	2021-05-30 12:40:09	1	4	1	2	2	1	1		2		1	RM2500 ke bawah	1	1	1	3	1	1	1	2	3	1	2	2	1	2	2	3	1	1	4	2	1	1	1	3	35	0	0	0	0	1	0	0	1
260	12700256887	405035993	2021-05-30 12:13:18	2021-05-30 12:44:55	1	5	2	1	2	2	2		5		3		1	1	2	3	3	2	2	2	2	2	3	3	2	2	2	2	2	2	2	4	2	2	2	1	44	1	1	1	1	1	0	1	1
261	12700254556	405035993	2021-05-30 12:13:22	2021-05-30 12:44:51	1	5	2	1	2	2	2		0	srp	1		1	1	1	2	4	3	2	1	1	2	3	3	2	2	3	4	2	2	2	2	1	2	3	2	46	1	1	2	1	1	0	0	1
262	12700250498	405035993	2021-05-30 12:08:28	2021-05-30 12:42:00	1	4	2	1	1	2	5		4		3		3	1	2	3	3	2	1	1	2	2	2	1	2	1	2	2	1	1	1	3	2	1	1	1	32	0	3	0	0	1	1	0	1
263	12700246942	405035993	2021-05-30 12:02:20	2021-05-30 13:19:35	1	5	1	1	2	1	1		0	Meninggal	0	Duit bantuan sebulan RM50	1	1	3	3	2	2	1	1	5	2	3	2	1	2	2	1	1	2	1	2	5	2	1	1	39	1	1	0	0	1	1	0	2
264	12700245776	405035993	2021-05-30 12:04:46	2021-05-30 12:18:12	1	5	2	1	2	2	3		0	Sekolah Menengah SPM (PKT1)	1		1	2	4	2	3	2	1	2	1	2	3	2	1	2	2	3	2	2	1	3	2	1	1	2	38	1	0	0	0	2	1	1	1
265	12700238938	405035993	2021-05-30 11:59:46	2021-05-30 12:32:17	1	5	1	4	2	1	2		2		1		1	1	0	2	4	4	3	2	4	4	2	3	2	1	3	3	2	3	3	3	3	2	2	3	56	1	0	2	0	2	0	1	2
266	12700238448	405035993	2021-05-30 11:59:40	2021-05-30 12:15:07	1	5	2	1	2	2	2		2		1		1	3	4	3	3	3	2	2	1	3	3	2	2	2	2	1	2	3	1	2	2	2	2	1	41	0	1	1	1	1	1	1	2
267	12700236958	405035993	2021-05-30 11:58:46	2021-05-30 15:31:59	1	2	2	3	2	2	2		2		1		1	1	4	3	2	1	2	2	2	1	2	1	1	1	2	2	1	1	2	2	2	2	2	1	32	0	1	0	0	0	1	0	1
268	12700235700	405035993	2021-05-30 11:57:40	2021-05-30 12:08:59	1	1	1	1	2	1	2		2		1		1	1	1	2	3	3	4	1	2	2	2	4	2	1	2	1	2	3	1	3	2	2	2	1	43	0	1	0	0	0	1	0	1
269	12700234993	405035993	2021-05-30 11:56:17	2021-05-30 12:08:18	1	4	2	1	2	2	2		2		1		1	1	1	2	3	3	2	3	2	4	3	4	2	2	2	2	2	4	1	3	3	1	1	1	48	1	1	2	1	3	1	0	2
270	12700231905	405035993	2021-05-30 11:54:05	2021-05-30 12:54:34	1	1	1	1	3	1	2		2		1		1	1	3	1	4	3	2	2	3	3	1	2	2	2	2	2	1	1	2	2	2	2	2	1	41	1	1	1	1	2	0	0	1
271	12700230451	405035993	2021-05-30 11:52:52	2021-05-30 15:14:54	1	2	2	1	2	2	2		2		1		1	1	1	3	2	1	1	1	2	1	5	1	1	1	1	2	3	2	3	4	4	3	1	1	40	0	0	1	0	0	0	0	0
272	12700230280	405035993	2021-05-30 11:52:12	2021-05-30 12:00:16	1	2	1	1	2	2	3		3		1		1	2	1	2	2	2	3	1	2	2	2	2	3	4	4	5	5	5	1	1	4	1	5	1	55	3	3	3	3	3	3	2	1
273	12700227908	405035993	2021-05-30 11:50:20	2021-05-30 11:58:49	1	5	2	1	2	1	1		2		1		1	1	3	2	2	2	2	3	1	2	4	2	1	3	2	3	3	4	2	3	2	2	2	2	47	0	1	0	0	1	0	0	2
274	12700224769	405035993	2021-05-30 11:47:08	2021-05-30 11:59:34	1	1	1	1	2	2	4		4		3		4	1	0	2	3	2	2	2	3	2	1	2	2	2	3	2	2	2	2	3	2	2	4	2	45	0	0	0	0	0	1	0	0
275	12700160775	405035993	2021-05-30 10:59:46	2021-05-30 11:16:24	1	4	2	1	2	2	4		2		3		1	1	4	2	2	2	3	3	1	2	3	2	2	3	1	2	1	1	1	2	1	1	1	1	35	0	0	0	0	0	1	0	2
276	12699966499	405035993	2021-05-30 06:56:45	2021-05-30 07:04:29	1	5	2	1	1	2	5		4		3		1	1	1	1	2	2	1	2	1	2	1	1	1	3	1	3	1	5	1	4	3	1	1	1	37	0	2	0	0	0	0	0	0
277	12699615813	405035993	2021-05-30 00:53:30	2021-05-30 01:06:06	1	4	2	1	1	2	2		2		1		1	1	3	2	3	1	3	2	1	2	4	3	2	1	2	3	2	3	1	2	3	2	3	1	44	3	2	3	1	2	3	1	1
278	12699571236	405035993	2021-05-30 00:15:44	2021-05-30 00:34:42	1	4	2	1	2	2	2		2		1		1	1	3	1	3	2	1	1	1	1	3	2	1	2	2	2	3	1	1	3	2	1	1	1	34	0	0	0	1	1	1	1	2
279	12699559973	405035993	2021-05-30 00:06:34	2021-05-30 00:16:16	1	5	2	1	1	2	2		3		2		1	1	2	3	3	2	1	2	2	1	3	1	1	2	1	1	2	2	1	1	2	1	1	1	31	0	1	0	0	1	1	0	1
280	12699534991	405035993	2021-05-29 23:46:21	2021-05-29 23:56:51	1	4	2	1	1	2	4		5		3		2	1	2	1	3	2	2	1	3	2	1	4	2	3	1	1	3	4	1	1	4	1	1	1	41	2	3	1	0	0	1	0	1
281	12699514467	405035993	2021-05-29 23:30:01	2021-05-29 23:37:36	1	4	2	1	2	2	2		2		1		2	1	2	1	3	2	2	3	1	1	3	1	1	1	1	1	1	2	1	3	2	1	1	3	34	3	2	3	2	3	3	2	2
282	12699510486	405035993	2021-05-29 23:26:23	2021-05-29 23:35:37	1	4	1	1	1	2	2		2		2		1	1	2	2	3	2	2	1	2	2	4	1	2	1	2	3	1	2	1	1	2	1	1	2	36	2	2	1	2	2	1	2	1
283	12699509915	405035993	2021-05-29 23:26:12	2021-05-29 23:34:32	1	5	1	1	1	2	3		3		1		1	1	0	1	1	1	1	2	1	1	1	1	1	2	2	3	2	2	1	5	2	2	1	1	33	3	2	1	2	0	0	2	3
284	12699500189	405035993	2021-05-29 23:18:33	2021-05-29 23:29:37	1	5	2	1	3	2	4		2		2		1	1	1	1	4	4	5	2	2	5	3	3	2	5	3	3	2	3	3	3	3	2	4	2	63	1	2	2	0	1	1	2	2
285	12699489656	405035993	2021-05-29 23:10:45	2021-05-29 23:27:27	1	3	1	2	1	2	4		4		3		1	1	0	4	2	2	3	1	2	2	1	2	1	4	2	1	2	2	2	2	2	2	1	1	37	0	0	0	0	0	0	0	0
286	12699462935	405035993	2021-05-29 22:50:27	2021-05-29 22:56:34	1	5	1	1	3	2	3		3		2		1	1	2	3	3	4	2	2	1	3	1	4	3	2	2	1	2	2	1	2	4	4	2	1	46	1	0	1	0	1	1	0	2
287	12699458550	405035993	2021-05-29 22:46:56	2021-05-29 22:55:29	1	4	2	1	1	2	2		2		1		1	1	3	2	2	1	4	2	2	1	2	2	1	1	1	2	2	2	1	2	2	1	1	2	34	0	1	0	0	0	0	0	2
288	12699447385	405035993	2021-05-29 22:38:05	2021-05-29 22:49:45	1	5	2	1	1	2	5		5		3		1	1	0	1	2	2	3	1	1	1	2	3	1	2	2	1	2	2	1	3	2	1	2	1	35	1	2	1	0	1	1	1	1
289	12699441970	405035993	2021-05-29 22:33:38	2021-05-29 22:42:28	1	4	2	3	2	2	2		3		1		1	1	2	2	3	1	1	1	2	1	3	1	1	2	2	2	1	2	1	2	2	1	1	2	32	2	1	1	0	1	2	2	2
290	12699436906	405035993	2021-05-29 22:30:06	2021-05-29 22:38:16	1	5	2	1	1	1	4		4		3		1	1	1	1	5	2	2	2	2	1	5	2	1	5	3	4	1	2	2	2	2	1	1	4	49	1	0	0	0	1	1	0	1
291	12699434948	405035993	2021-05-29 22:28:39	2021-05-29 22:39:15	1	5	2	1	1	2	5		5		3		1	2	0	2	3	3	2	2	2	1	2	2	2	3	3	3	2	2	2	3	2	2	4	3	48	1	1	1	0	1	1	1	2
292	12699432460	405035993	2021-05-29 22:26:26	2021-05-29 22:52:19	1	4	2	1	2	2	2		2		2		1	1	1	1	3	2	2	1	2	1	2	2	1	2	2	1	2	2	1	2	2	1	1	1	33	0	0	0	1	1	0	0	0
293	12699430514	405035993	2021-05-29 22:24:54	2021-05-29 22:35:52	1	5	2	1	1	2	2		2		1		1	1	1	1	4	2	2	2	4	3	1	2	2	4	3	3	2	4	1	5	3	1	1	1	50	0	1	1	0	2	0	1	0
294	12699429797	405035993	2021-05-29 22:24:15	2021-05-29 22:34:24	1	5	2	1	2	2	2		2		1		1	1	1	2	4	3	2	1	1	2	4	2	1	1	2	2	1	3	2	3	3	2	2	1	42	1	2	3	1	3	1	3	3
295	12699429328	405035993	2021-05-29 22:22:55	2021-05-29 22:35:25	1	5	2	1	2	2	2		4		2		1	1	2	1	2	4	2	1	1	2	2	2	2	5	2	2	2	2	1	5	3	1	2	1	44	1	0	1	0	1	1	0	1
296	12699426584	405035993	2021-05-29 22:21:49	2021-05-29 22:31:28	1	4	1	1	2	2	4		3		2		1	2	3	2	3	2	1	3	2	2	1	1	1	2	2	1	1	2	1	2	2	2	1	1	33	0	0	0	0	0	1	0	0
297	12699423828	405035993	2021-05-29 22:19:37	2021-05-29 22:34:33	1	5	2	1	2	2	2		2		2		1	2	1	1	5	3	2	2	2	4	1	3	2	5	1	2	2	5	1	5	5	1	3	1	55	0	1	0	0	1	0	2	2
298	12699422842	405035993	2021-05-29 22:19:33	2021-05-29 22:37:34	1	4	2	1	1	2	4		4		3		1	1	1	1	4	3	2	3	2	3	2	3	4	5	3	3	2	4	3	5	5	5	2	2	65	2	3	2	2	2	2	2	2
299	12699421076	405035993	2021-05-29 22:17:41	2021-05-29 22:26:22	1	5	1	1	1	1	3		4		1		1	1	3	3	3	2	1	1	2	2	2	2	2	2	2	2	1	2	1	2	2	1	1	1	34	0	0	0	0	0	0	1	1
300	12699414001	405035993	2021-05-29 22:12:59	2021-05-29 22:29:31	1	4	2	1	2	2	3		4		1		1	1	4	1	1	1	1	2	2	1	3	2	2	2	1	1	1	2	1	1	3	1	5	2	35	0	3	1	3	1	1	1	1
301	12699413706	405035993	2021-05-29 22:12:15	2021-05-29 22:18:38	1	5	2	1	2	2	3		2		1		1	1	4	2	3	1	2	1	1	1	2	1	1	2	2	2	2	2	1	3	2	2	3	1	35	2	2	2	1	3	2	3	3
302	12699411384	405035993	2021-05-29 22:10:55	2021-05-29 22:20:02	1	4	2	1	1	2	0	MASTER	5		3		1	2	1	1	4	3	3	3	2	2	5	2	2	4	3	4	3	3	2	3	2	2	4	1	57	1	0	0	0	1	0	1	2
303	12699409379	405035993	2021-05-29 22:09:23	2021-05-29 22:16:08	1	5	2	1	1	2	5		5		3		1	1	1	1	3	2	1	4	1	2	1	2	1	5	3	4	4	2	2	3	2	1	1	1	45	3	2	3	3	3	3	3	2
304	12699408421	405035993	2021-05-29 22:07:52	2021-05-29 22:27:12	1	4	2	1	2	2	2		2		1		1	1	1	1	4	3	1	1	1	4	1	1	1	2	1	1	1	5	1	5	1	1	1	1	37	1	1	0	0	3	1	0	0
305	12699406736	405035993	2021-05-29 22:07:35	2021-05-29 22:14:58	1	5	2	1	1	1	4		4		2		1	1	3	3	2	2	2	2	1	1	2	2	1	5	3	2	4	2	2	2	4	3	3	5	50	2	1	2	2	2	1	2	2
306	12699400497	405035993	2021-05-29 22:03:08	2021-05-29 22:12:01	1	4	2	1	2	2	3		5		3		4	1	1	1	4	2	3	2	1	2	2	3	3	4	4	5	4	5	4	2	1	1	3	2	57	1	2	1	1	2	2	2	2
307	12699398790	405035993	2021-05-29 22:01:39	2021-05-29 22:11:22	1	4	2	1	2	2	5		4		2		1	1	0	2	3	2	4	2	4	2	5	2	2	5	4	3	2	3	2	3	4	3	4	1	60	1	2	1	1	2	2	2	2
308	12699397321	405035993	2021-05-29 22:00:43	2021-05-29 22:07:55	1	4	2	1	1	2	4		4		2		2	1	1	1	3	2	3	1	2	2	1	2	1	2	2	3	1	5	2	3	2	1	2	1	41	2	1	1	3	2	1	2	2
309	12699395346	405035993	2021-05-29 21:59:03	2021-05-29 22:08:41	1	4	2	1	2	2	3		4		2		1	1	3	3	2	2	2	2	3	1	4	4	4	2	2	2	4	3	1	3	4	1	4	4	54	2	3	1	2	2	0	2	3
310	12699394849	405035993	2021-05-29 21:58:08	2021-05-29 22:07:38	1	5	2	1	1	2	2		3		1		1	1	2	2	3	2	2	2	2	3	2	4	1	2	3	5	4	2	1	2	2	2	2	2	48	1	2	2	0	2	1	1	0
311	12699394776	405035993	2021-05-29 21:58:33	2021-05-29 22:15:15	1	4	1	1	2	2	2		3		1		1	1	1	1	5	2	3	4	2	2	1	4	2	1	4	3	2	4	1	4	5	3	1	4	57	1	0	0	0	2	1	0	2
312	12699394705	405035993	2021-05-29 21:58:25	2021-05-29 22:13:14	1	4	2	1	1	1	0	Master	2		2		1	1	2	1	5	3	2	4	2	2	2	2	2	4	3	4	2	5	1	3	3	5	5	4	63	1	0	0	2	1	2	1	1
313	12699394599	405035993	2021-05-29 21:57:42	2021-05-29 22:06:09	1	4	2	4	2	2	3		3		2		1	2	3	1	3	2	1	2	1	1	4	1	1	1	1	1	1	2	1	2	2	1	1	1	30	0	2	0	1	0	0	1	2
314	12699393986	405035993	2021-05-29 21:57:41	2021-05-29 22:07:08	1	4	2	1	2	1	2		3		2		1	1	1	1	5	5	3	5	3	2	4	3	4	5	4	3	2	5	3	5	3	2	4	1	71	3	2	2	2	3	3	3	3
315	12699393954	405035993	2021-05-29 21:57:02	2021-05-29 22:21:48	1	5	2	1	1	2	5		4		3		2	1	1	1	4	3	3	2	2	3	2	3	1	4	2	2	2	4	2	4	3	2	1	2	51	2	1	1	0	2	2	1	1
316	12699393688	405035993	2021-05-29 21:57:49	2021-05-29 22:08:59	1	5	2	1	2	2	4		3		3		1	1	1	1	5	5	4	3	1	3	2	4	5	5	5	5	5	5	5	5	3	4	4	5	83	2	1	2	3	2	2	2	2
317	12699393518	405035993	2021-05-29 21:57:43	2021-05-29 22:06:35	1	4	2	1	2	2	2		4		2		1	1	1	1	3	2	2	3	2	3	2	4	2	5	3	4	3	4	2	4	5	1	2	2	58	1	2	1	0	1	1	2	2
318	12699393418	405035993	2021-05-29 21:57:24	2021-05-29 22:24:52	1	5	2	1	1	2	2		4		1		1	1	4	1	4	4	0	2	1	3	5	3	1	4	2	2	2	2	2	5	4	1	3	2	52	1	0	2	0	2	1	0	1
319	12699393100	405035993	2021-05-29 21:57:35	2021-05-29 22:15:50	1	4	1	1	2	2	4		4		2		1	1	0	0	2	1	1	1	1	1	2	1	5	1	1	4	2	1	4	1	4	3	1	1	38	0	0	0	0	0	0	0	0
320	12699393049	405035993	2021-05-29 21:57:25	2021-05-29 22:03:42	1	4	2	1	1	2	4		5		3		2	1	4	1	4	2	2	1	1	1	2	1	2	1	2	2	2	2	1	3	3	1	1	1	35	1	0	0	0	0	0	1	1
321	12699392671	405035993	2021-05-29 21:56:17	2021-05-29 22:08:45	1	5	2	1	1	2	4		4		2		2	1	4	1	4	2	1	1	3	2	4	2	2	3	2	1	1	2	1	2	2	2	2	2	41	2	1	1	1	1	0	1	2
322	12699391414	405035993	2021-05-29 21:56:15	2021-05-29 22:10:39	1	5	2	1	1	2	3		2		1		1	1	3	1	3	3	2	1	3	3	2	4	2	4	3	3	2	3	2	4	4	2	2	3	55	2	1	0	0	1	1	1	1
323	12699391349	405035993	2021-05-29 21:55:41	2021-05-29 22:09:23	1	5	1	1	1	2	4		2		3		1	1	1	2	2	2	2	1	1	3	1	3	2	4	2	2	2	2	2	2	2	2	2	2	41	1	1	1	0	1	1	0	0
324	12699390745	405035993	2021-05-29 21:55:39	2021-05-29 22:07:32	1	5	2	1	2	2	2		2		2	RM5000	1	1	4	3	3	3	2	4	1	2	1	1	1	2	3	1	1	3	1	5	3	1	4	1	43	0	0	0	1	1	1	0	0
325	12699390622	405035993	2021-05-29 21:55:08	2021-05-29 22:06:30	1	5	2	1	3	2	3		2		1		1	1	1	1	5	2	2	1	1	3	2	2	2	4	5	5	4	5	5	5	2	4	2	4	65	0	0	0	0	1	0	0	0
326	12696185206	405035993	2021-05-28 15:47:26	2021-05-28 17:07:25	1	3	1	2	1	2	4		4		3		1	1	0	4	2	4	2	1	2	1	1	1	1	1	1	2	2	3	2	2	2	1	1	1	33	1	0	2	0	0	1	0	1
327	12693546444	405035993	2021-05-27 21:55:03	2021-05-27 22:06:06	1	5	1	1	3	2	1		2		1		4	1	1	2	3	3	5	2	4	3	1	2	2	5	2	2	4	4	1	3	4	2	1	2	55	1	2	2	1	3	0	0	1
328	12693385000	405035993	2021-05-27 21:08:07	2021-05-27 21:19:43	1	2	2	1	1	2	2		2		1		1	1	4	3	2	1	1	2	3	1	1	1	2	1	1	2	1	1	1	1	2	1	2	1	28	0	0	0	0	0	0	0	1
329	12692862189	405035993	2021-05-27 17:53:56	2021-05-27 18:11:13	1	5	1	1	1	2	2		2		1		1	1	4	2	2	2	2	2	2	2	2	3	2	2	3	2	1	2	2	3	3	2	3	2	44	1	1	1	0	1	1	1	1
330	12692415410	405035993	2021-05-27 14:33:17	2021-05-27 14:46:14	1	5	2	1	2	2	3		2		2		1	1	1	1	2	3	1	4	1	3	1	3	1	4	2	3	3	3	1	4	3	2	1	1	46	1	3	1	1	1	1	2	1
331	12685031969	405035993	2021-05-25 08:55:34	2021-05-25 09:05:43	1	5	1	1	2	2	2		3		1		1	1	1	1	5	5	5	4	5	5	1	5	5	4	5	4	4	5	4	5	5	5	5	3	89	3	3	2	2	3	2	2	2
332	12684088082	405035993	2021-05-25 01:55:55	2021-05-25 02:05:04	1	3	2	1	1	2	5		4		2		1	1	1	2	3	3	3	2	3	2	3	1	1	2	2	2	1	2	1	1	5	1	1	1	40	1	0	0	0	0	1	0	0
333	12683610742	405035993	2021-05-24 23:10:06	2021-05-24 23:39:47	1	2	2	1	1	2	4		5		3		2	2	1	4	2	3	1	1	3	3	1	1	1	1	1	1	2	2	1	1	2	1	1	1	30	0	2	0	0	0	0	0	0
334	12683471373	405035993	2021-05-24 22:25:50	2021-05-24 22:36:39	1	2	1	4	2	2	1		2		1		1	1	0	4	1	2	1	2	1	1	1	1	2	1	2	1	1	1	1	1	1	1	1	1	24	0	0	0	0	1	0	1	0
335	12682156837	405035993	2021-05-24 11:53:00	2021-05-24 12:05:42	1	5	2	1	1	2	2		2		2		1	1	0	1	4	2	2	1	1	2	1	2	1	5	2	2	2	2	1	3	2	1	3	1	40	1	1	1	1	2	0	1	1
336	12682100345	405035993	2021-05-24 11:17:40	2021-05-24 11:32:00	1	5	2	1	1	2	2		2		1		1	2	3	2	2	2	1	2	1	2	1	1	1	2	1	2	1	2	1	2	1	1	1	1	28	1	1	0	0	1	0	0	2
337	12681775028	405035993	2021-05-24 07:45:24	2021-05-24 07:54:08	1	5	2	1	1	2	5		5		1		1	1	2	3	3	2	2	1	3	2	4	1	1	2	2	2	1	1	1	2	2	1	1	1	35	0	0	0	0	0	0	1	0
338	12681757670	405035993	2021-05-24 07:30:51	2021-05-24 07:50:34	1	4	2	1	1	2	2		2		1		1	1	2	3	4	2	2	2	2	2	2	1	2	3	3	2	2	2	1	1	1	2	1	1	38	2	1	0	0	0	0	1	0
339	12681067960	405035993	2021-05-23 20:15:33	2021-05-23 20:27:06	1	5	2	1	1	2	2		2		3		1	2	4	4	2	4	1	1	3	2	4	1	2	4	2	2	2	3	2	2	5	2	1	1	46	0	1	0	1	1	0	1	1
340	12680797520	405035993	2021-05-23 14:58:52	2021-05-23 15:05:33	1	1	2	1	1	2	2		2		1		2	1	3	3	2	1	2	1	3	2	2	2	3	3	3	2	1	2	2	2	3	2	2	2	42	1	1	0	0	0	0	0	0
341	12680736864	405033733	2021-05-23 13:25:27	2021-05-23 13:35:18	1	1	1	1	3	2	5		4		3		2	2	0	3	2	1	2	2	1	2	1	1	5	4	3	1	1	1	2	1	2	3	1	1	37	0	3	0	0	1	0	1	0
342	12680729379	405035993	2021-05-23 13:12:32	2021-05-23 13:46:22	1	4	2	1	1	2	0	SPM	0	SEKOLAH VOKASIONAL	1		1	3	2	2	2	2	2	1	1	2	3	2	1	2	2	2	2	2	1	1	1	2	3	3	37	1	1	0	1	1	0	0	1
343	12680699741	405035993	2021-05-23 12:24:16	2021-05-23 12:36:41	1	4	1	1	1	2	4		3		2		1	2	4	3	2	1	2	2	2	1	1	1	1	2	2	2	1	2	1	2	1	1	2	1	30	0	0	0	0	1	0	0	0
344	12680679075	405035993	2021-05-23 11:52:03	2021-05-23 12:01:55	1	5	2	1	1	2	3		2		1		1	1	1	1	3	2	2	2	3	3	2	2	3	2	3	3	2	5	3	4	3	3	3	2	55	0	1	1	0	1	0	1	1
345	12680640717	405035993	2021-05-23 10:57:22	2021-05-23 11:12:09	1	4	2	1	1	2	2		2		1		1	2	0	1	1	1	1	1	1	1	2	1	1	1	2	1	1	2	1	2	1	1	2	1	25	0	0	0	0	0	0	0	0
346	12680620199	405035993	2021-05-23 10:28:08	2021-05-23 10:42:54	1	4	1	2	1	2	2		2		2		1	1	1	0	1	2	4	2	2	2	4	2	2	2	3	3	3	4	1	2	2	1	5	2	49	0	1	0	0	0	0	0	0
347	12680536525	405035993	2021-05-23 08:41:46	2021-05-23 08:48:27	1	2	2	1	1	2	2		2		2		1	1	0	4	2	1	1	1	2	1	1	2	2	2	4	1	2	1	1	2	2	2	1	1	32	0	0	0	0	1	1	0	1
348	12680192061	405035993	2021-05-23 02:12:54	2021-05-23 02:33:11	1	1	1	1	1	2	2		2		1	Bawa 1000	1	1	1	1	5	2	2	1	1	3	1	2	2	1	5	2	2	4	1	1	5	1	2	2	45	1	0	0	0	0	0	0	0
349	12680144301	405035993	2021-05-23 01:29:34	2021-05-23 12:18:37	1	4	2	3	1	2	4		4		2		1	2	2	4	3	1	2	1	2	1	2	1	2	3	3	1	2	2	1	2	2	1	2	1	35	0	1	3	0	1	1	1	1
350	12679939113	405035993	2021-05-22 22:51:17	2021-05-22 22:59:34	1	2	2	1	1	2	4		4		2		1	1	2	4	1	1	2	1	1	1	1	1	1	2	1	5	1	1	1	3	1	1	2	1	29	3	3	0	0	3	0	3	0
351	12679804558	405035993	2021-05-22 21:14:52	2021-05-22 21:27:16	1	4	2	1	1	2	2		2		1		1	1	4	3	2	2	1	1	2	4	1	4	1	2	2	1	2	3	1	3	2	1	3	1	39	0	1	0	0	3	0	1	1
352	12679799187	405035993	2021-05-22 21:10:59	2021-05-22 21:19:41	1	1	2	1	1	2	2		2		2		1	1	0	3	3	1	1	2	2	1	2	1	1	1	2	2	1	1	1	2	4	1	1	1	31	0	0	0	0	0	0	0	0
353	12679786869	405035993	2021-05-22 21:01:43	2021-05-22 21:15:57	1	5	2	2	1	2	3		2		1		2	3	0	4	2	2	1	1	2	2	3	1	1	1	2	1	1	1	1	2	1	1	1	1	28	0	0	1	0	0	0	1	1
354	12679743859	405035993	2021-05-22 20:28:39	2021-05-22 20:38:14	1	2	1	1	1	2	4		0	SKM	3		2	3	3	2	3	2	1	2	1	2	3	2	4	5	2	1	1	2	1	1	3	2	1	1	40	0	0	0	0	1	0	0	0
355	12679740187	405035993	2021-05-22 20:24:49	2021-05-22 20:40:01	1	2	1	1	2	2	4		0	Diploma	2	8000	1	1	0	2	3	1	1	3	1	1	1	1	1	2	2	2	2	2	1	2	2	2	1	2	33	0	0	0	0	0	0	0	0
356	12679706726	405035993	2021-05-22 19:58:46	2021-05-22 20:10:41	1	2	1	1	1	2	3		3		2		1	1	0	1	2	1	1	2	2	1	2	1	2	2	1	1	1	1	1	1	1	1	1	1	26	1	0	0	0	0	0	0	0
357	12679699039	405035993	2021-05-22 19:49:36	2021-05-22 20:15:35	1	2	1	1	1	2	0	Master (pendidikan khas)	0	Diploma	2		1	1	1	2	2	2	2	2	2	2	2	1	1	2	1	1	1	4	2	2	4	2	1	2	38	0	0	0	0	0	0	1	0
358	12679696457	405035993	2021-05-22 19:50:22	2021-05-22 20:03:09	1	5	2	1	3	2	3		3		2		1	1	0	4	2	1	1	2	2	2	4	2	1	3	2	2	1	1	1	2	2	1	1	1	34	2	0	0	0	1	1	0	0
359	12679663891	405035993	2021-05-22 19:23:20	2021-05-22 19:35:36	1	5	2	1	1	2	4		3		2		1	1	0	1	1	2	1	2	1	1	1	1	1	2	2	1	1	1	1	2	1	1	1	1	25	0	0	0	0	0	0	1	0
360	12679663563	405035993	2021-05-22 19:23:35	2021-05-22 19:32:45	1	2	2	1	1	2	1		2		1		1	1	3	2	4	2	1	1	2	2	3	2	1	4	2	2	2	1	1	2	2	1	1	1	37	1	0	1	1	2	1	1	2
361	12679642165	405035993	2021-05-22 19:04:28	2021-05-22 20:38:52	1	4	2	1	3	2	4		0	diploma	2		1	2	4	1	3	1	2	2	2	1	1	4	3	2	1	4	2	1	1	2	2	1	1	1	37	0	2	0	0	0	0	2	1
362	12679615166	405035993	2021-05-22 18:40:46	2021-05-22 19:09:00	1	1	2	1	1	2	4		2		2	RM8000	1	1	2	2	4	2	3	3	1	2	5	2	3	3	3	5	1	3	3	2	2	3	4	3	57	1	0	1	0	1	0	0	0
363	12679584809	405035993	2021-05-22 18:12:18	2021-05-22 22:52:53	1	2	1	1	1	2	0	diploma	0	diploma	2		1	2	0	4	1	1	2	1	2	1	1	1	1	1	1	2	2	1	2	2	2	2	2	2	30	0	2	1	0	1	0	0	3
364	12679530507	405035993	2021-05-22 17:22:11	2021-05-22 17:38:36	1	5	2	1	1	2	2		1		1		1	1	1	3	3	2	1	2	2	2	2	2	2	3	2	2	2	2	1	3	3	1	1	1	39	1	1	0	0	0	0	0	1
365	12679513968	405035993	2021-05-22 17:06:42	2021-05-22 17:17:34	1	4	2	1	1	1	2		2		1		1	1	3	3	2	1	1	1	1	1	2	1	1	1	1	2	2	1	1	2	1	1	1	1	25	0	0	0	0	1	1	0	1
366	12679471386	405035993	2021-05-22 16:26:05	2021-05-22 16:41:50	1	5	2	1	1	2	2		2		1		1	1	3	1	3	2	2	2	2	2	2	2	2	2	3	2	2	2	2	2	2	3	1	2	42	1	1	1	0	1	1	2	0
367	12679470095	405035993	2021-05-22 16:24:13	2021-05-22 16:52:33	1	5	2	2	1	2	2		2		1		1	1	1	2	2	1	2	2	1	1	1	1	3	2	4	3	1	5	1	2	2	1	1	1	37	1	2	0	0	1	0	0	2
368	12679465794	405035993	2021-05-22 16:20:24	2021-05-22 16:30:57	1	5	1	2	1	2	2		2		1		1	1	0	1	5	2	1	2	2	2	1	1	2	1	2	2	2	1	2	3	3	1	1	1	37	0	0	0	0	1	0	0	0
369	12679461014	405035993	2021-05-22 16:16:10	2021-05-22 16:23:01	1	5	2	1	1	2	2		2		1		1	1	1	1	4	2	3	2	2	4	1	2	3	4	5	3	1	5	1	5	5	2	2	1	57	1	1	1	0	2	2	1	2
370	12679448244	405035993	2021-05-22 16:01:19	2021-05-22 16:17:45	1	5	2	1	1	1	4		2		1		1	1	0	2	2	2	1	1	2	1	1	1	1	2	1	1	1	1	1	2	1	1	1	1	25	0	0	0	0	0	0	0	0
371	12679446570	405035993	2021-05-22 16:01:48	2021-05-22 16:22:34	1	5	2	2	1	2	2		2		1		1	1	4	2	4	3	2	2	3	2	3	2	5	2	3	3	2	2	2	4	4	3	2	1	54	0	1	1	0	1	0	0	2
372	12679444932	405035993	2021-05-22 16:02:00	2021-05-22 16:11:21	1	5	2	1	1	2	2		4		1		1	3	1	3	2	4	1	4	5	1	2	3	5	4	1	4	3	3	3	1	5	2	5	1	59	3	2	0	0	1	3	2	1
373	12679443561	405035993	2021-05-22 16:00:44	2021-05-22 16:14:01	1	5	2	2	1	2	2		2		1		1	1	1	1	4	2	3	2	3	1	1	3	1	3	3	4	2	4	2	3	4	1	3	1	50	1	1	0	0	1	1	0	1
374	12679441980	405035993	2021-05-22 15:59:04	2021-05-22 16:05:52	1	5	2	1	1	1	3		3		1		1	1	0	1	2	2	1	1	2	1	5	1	1	5	1	1	1	1	1	2	2	1	1	1	33	1	0	1	1	1	1	2	1
375	12679436713	405035993	2021-05-22 15:53:22	2021-05-22 16:01:47	1	1	2	1	2	2	0	Diploma	0	IKM Jasin	2		1	1	0	2	3	4	2	2	2	1	2	2	2	2	2	2	3	2	1	2	2	1	2	1	40	0	0	0	0	0	0	0	0
376	12679436134	405035993	2021-05-22 15:53:12	2021-05-22 16:00:18	1	4	2	1	1	1	4		4		2		1	1	1	1	5	4	5	4	2	3	3	3	5	5	5	5	4	5	3	5	1	4	4	5	80	2	1	0	0	3	1	1	1
377	12679430123	405035993	2021-05-22 15:46:07	2021-05-22 16:08:59	1	3	2	3	1	2	4		4		2		1	1	3	3	5	3	5	3	3	3	3	3	3	3	3	3	3	3	3	3	3	3	3	3	64	2	2	1	2	2	2	2	2
378	12679429726	405035993	2021-05-22 15:44:31	2021-05-22 16:00:52	1	4	2	4	1	2	2		2		1		1	1	1	1	2	4	2	4	1	1	2	4	2	4	2	4	4	5	2	2	4	1	2	2	54	1	1	1	1	1	1	2	1
379	12679426951	405035993	2021-05-22 15:38:04	2021-05-22 15:55:12	1	4	2	1	1	2	4		2		2		1	2	0	3	2	3	1	1	4	3	1	2	2	4	2	1	2	2	1	4	3	1	1	1	41	0	2	0	1	0	2	1	0
380	12679425531	405035993	2021-05-22 15:42:14	2021-05-22 15:53:49	1	4	2	3	1	2	2		4		1		1	1	1	1	3	2	4	3	5	2	1	2	5	5	3	3	5	5	5	5	5	2	4	5	74	1	0	2	0	0	3	0	2
381	12679420616	405035993	2021-05-22 15:36:45	2021-05-22 15:48:30	1	4	2	1	1	2	0	sijil	2		1		1	1	1	1	5	3	4	4	2	2	1	2	3	4	4	5	3	5	2	3	3	2	1	1	59	1	0	1	0	1	1	1	1
382	12679410573	405035993	2021-05-22 15:27:53	2021-05-22 15:48:02	1	2	1	1	2	2	4		4		2		1	3	1	4	2	3	4	3	2	2	1	1	2	3	2	2	2	3	1	3	2	1	2	1	42	1	0	1	0	1	1	2	2
383	12679394875	405035993	2021-05-22 15:07:43	2021-05-22 15:27:17	1	5	2	1	2	2	4		4		3		1	1	1	1	3	4	2	2	3	4	2	3	2	5	3	3	2	3	1	4	4	2	2	3	57	2	1	1	2	2	1	2	2
384	12679384676	405035993	2021-05-22 15:02:15	2021-05-22 15:12:31	1	5	2	1	1	2	3		3		2		1	1	2	4	2	2	1	1	2	1	2	1	1	2	2	2	1	2	1	0	2	2	2	1	30	0	1	0	0	0	1	0	1
385	12679383249	405035993	2021-05-22 15:01:10	2021-05-22 15:22:12	1	4	1	1	1	2	4		4		3		1	2	0	4	2	2	2	1	1	1	1	2	1	2	2	2	1	1	2	3	2	1	3	2	34	0	0	0	0	0	0	0	1
386	12679380274	405035993	2021-05-22 14:58:31	2021-05-22 15:09:05	1	2	1	1	1	2	4		5		2		3	1	3	2	3	2	2	2	5	2	4	2	5	5	3	2	2	2	4	5	3	4	3	1	61	1	1	2	2	1	3	1	1
387	12679372530	405035993	2021-05-22 14:50:28	2021-05-22 15:07:04	1	4	2	1	1	2	2		2		1	RM 3000 Kebawah	1	2	1	2	3	2	1	4	1	4	2	3	1	2	2	3	2	2	1	1	2	1	4	2	43	0	0	0	0	0	0	1	0
388	12679368999	405035993	2021-05-22 14:46:26	2021-05-22 14:58:44	1	5	2	1	1	2	4		3		2		1	1	1	3	3	2	3	1	2	1	1	4	2	5	3	2	1	1	1	3	3	1	1	4	44	1	0	0	0	2	1	1	0
389	12679362464	405035993	2021-05-22 14:39:29	2021-05-22 14:53:17	1	1	1	1	1	2	0	DIPLOMA PENDIDIKAN	2		2		1	2	0	2	2	2	4	1	5	2	2	2	1	1	4	4	4	2	1	3	3	3	3	2	51	1	1	0	0	0	0	0	0
390	12679354235	405035993	2021-05-22 14:30:31	2021-05-22 14:56:48	1	4	2	1	1	2	2		2		1		1	1	3	3	2	2	1	1	3	2	1	3	1	1	1	1	1	2	1	1	2	1	1	1	29	0	0	0	0	0	0	0	0
391	12679353459	405035993	2021-05-22 14:29:13	2021-05-22 23:06:13	1	1	1	1	1	1	4		2		1		1	1	1	1	3	2	1	1	2	2	1	1	2	3	2	1	2	2	1	2	5	1	1	1	36	1	0	0	0	1	0	0	2
392	12679319895	405033733	2021-05-22 13:55:53	2021-05-22 14:06:23	1	5	2	1	1	2	4		2		2		2	2	0	2	2	2	1	1	1	1	3	1	2	1	1	2	1	1	1	1	3	2	1	1	29	0	0	0	0	0	0	0	0
393	12707386346	405035993	2021-06-02 10:20:19	2021-06-02 10:35:31	1	5	2	1	2	2	2		2		1		1	1	0	4	2	2	1	2	1	2	2	2	2	2	2	2	1	1	1	2	2	2	1	1	33	0	0	1	0	1	1	0	1
394	12707359187	405035993	2021-06-02 10:06:12	2021-06-02 10:15:52	1	5	2	1	1	2	3		2		1	RM 2,179.28	1	1	3	2	3	2	1	2	1	1	3	1	2	1	1	2	2	3	1	3	2	1	1	1	34	0	1	0	0	1	0	0	2
395	12711105303	405035993	2021-06-03 11:25:45	2021-06-03 11:52:11	1	5	1	1	3	2	2		2		1		1	2	1	3	3	2	2	2	2	1	2	3	3	2	3	2	2	1	1	2	2	2	2	1	40	0	0	1	0	1	1	2	0
396	12708609406	405035993	2021-06-02 20:18:26	2021-06-02 20:43:01	1	4	2	1	3	2	4		2		2		1	1	4	4	5	2	4	1	4	2	2	2	2	3	2	2	1	1	2	5	5	1	2	1	49	0	1	0	0	0	0	0	1
397	12712260939	405035993	2021-06-03 20:49:03	2021-06-03 21:04:50	1	1	1	1	2	2	2		2		1		1	1	0	2	2	2	2	4	3	3	2	2	2	2	3	3	3	1	2	3	2	4	2	3	50	1	1	1	0	0	0	0	0
398	12715487105	405035993	2021-06-04 20:13:04	2021-06-04 20:29:35	1	4	1	4	3	2	2		2		1		1	1	3	3	2	2	4	2	2	1	2	4	2	2	4	4	3	5	2	5	5	2	2	2	57	0	1	1	0	1	0	0	1
399	12715158963	405035993	2021-06-04 17:25:01	2021-06-04 17:55:32	1	1	1	1	3	2	2		2		1		1	2	0	3	2	1	2	1	2	1	1	1	2	1	1	1	1	1	1	1	1	2	1	1	25	0	1	1	1	1	0	0	1
400	12715088700	405035993	2021-06-04 16:47:54	2021-06-04 16:59:04	1	5	2	1	3	2	2		5		2		1	1	1	2	2	1	1	2	2	2	4	2	1	2	1	1	1	2	1	1	2	2	1	1	32	0	1	0	0	0	0	0	0
401	12714999515	405035993	2021-06-04 16:06:28	2021-06-04 16:15:54	1	5	2	1	3	2	2		2		1		1	1	1	1	5	5	2	1	4	1	2	1	1	2	2	2	2	2	2	5	2	1	1	2	45	1	2	1	0	1	1	1	0
402	12714984888	405035993	2021-06-04 15:59:55	2021-06-04 16:13:17	1	5	2	1	3	2	2		2		0	1900	2	1	2	4	2	2	3	1	2	2	1	2	1	2	1	1	1	1	1	1	2	3	3	1	33	0	1	1	0	1	0	0	0
403	12714894666	405035993	2021-06-04 15:15:51	2021-06-04 16:46:07	1	5	2	1	3	2	4		2		2		1	1	1	2	4	2	2	1	2	2	3	2	2	4	2	2	1	4	2	3	2	3	2	2	47	2	1	1	1	1	0	2	1
404	12714838804	405035993	2021-06-04 14:41:47	2021-06-04 15:03:00	1	2	2	1	3	2	2		2		2		1	3	0	0	2	2	2	1	1	2	1	1	1	1	1	2	1	1	1	1	1	1	1	1	25	1	1	0	0	0	0	0	0
405	12714806539	405035993	2021-06-04 14:18:08	2021-06-04 14:29:16	1	5	1	1	3	2	2		2		0	Bawah RM1500	1	1	1	1	4	4	4	2	3	4	3	4	2	4	4	4	1	3	1	3	3	2	3	2	60	1	0	0	1	1	1	0	1
406	12714793957	405035993	2021-06-04 14:09:49	2021-06-04 14:24:05	1	5	2	1	3	2	2		2		2		1	1	3	1	2	2	2	1	2	2	2	1	1	3	3	3	2	2	1	2	3	1	1	1	37	0	0	0	0	0	0	0	0
407	12714779728	405035993	2021-06-04 13:59:06	2021-06-04 14:08:46	1	5	2	1	3	2	2		2		2		1	1	1	2	4	4	3	2	3	3	4	3	1	3	2	2	2	3	2	3	4	1	2	2	53	0	0	0	0	1	0	0	1
408	12714778361	405035993	2021-06-04 13:58:23	2021-06-04 14:05:49	1	5	2	1	3	2	2		3		1		1	1	1	2	3	3	2	1	1	3	3	3	2	2	2	3	2	3	2	3	3	2	2	2	47	1	3	1	0	1	1	0	0
409	12714762293	405035993	2021-06-04 13:45:41	2021-06-04 13:53:38	1	5	2	1	3	2	3		3		2		1	1	0	3	3	4	2	1	3	2	2	2	3	3	4	5	3	2	1	4	3	3	3	2	55	1	0	1	0	1	1	1	1
410	12714743233	405035993	2021-06-04 13:28:51	2021-06-04 13:43:30	1	5	2	1	3	2	2		2		1		1	1	1	1	4	2	1	2	1	2	1	2	1	3	1	1	1	3	1	3	2	1	2	1	35	0	0	1	0	1	0	0	0
411	12714733586	405035993	2021-06-04 13:20:18	2021-06-04 13:36:13	1	5	2	1	3	1	2		2		1		1	1	4	3	2	2	2	1	1	2	1	2	1	2	2	3	1	2	1	4	3	3	3	2	40	1	2	0	2	2	1	3	3
412	12714712316	405035993	2021-06-04 13:04:37	2021-06-04 13:16:03	1	5	1	1	1	2	4		4		2		1	1	3	3	2	1	2	1	2	1	2	1	3	5	2	2	2	2	1	2	2	1	2	1	37	0	0	0	0	0	2	0	3
413	12717919359	405035993	2021-06-05 13:24:55	2021-06-05 13:35:47	1	1	1	1	1	2	2		3		1		1	1	3	2	2	2	1	3	1	2	3	1	2	3	2	1	1	1	1	2	1	2	1	1	33	0	0	1	0	1	1	0	1
414	12717192946	405035993	2021-06-05 06:39:37	2021-06-05 06:48:23	1	5	2	1	3	2	4		3		2		1	1	3	2	1	1	2	4	1	2	1	2	1	5	1	1	1	1	1	1	1	1	2	1	31	1	1	2	1	2	2	1	1
415	12715992988	405035993	2021-06-04 23:13:06	2021-06-04 23:39:31	1	5	2	1	3	2	4		4		2		1	1	1	1	5	3	2	1	3	3	3	3	2	4	5	3	4	5	2	5	4	2	2	2	63	1	1	1	0	1	1	1	2
416	12715960181	405035993	2021-06-04 23:02:30	2021-06-04 23:11:43	1	5	2	1	3	2	2		2		1		1	1	2	2	2	4	2	1	2	2	2	2	1	3	1	2	2	2	1	2	2	1	1	2	37	2	3	2	3	3	3	3	2
417	12718416874	405035993	2021-06-05 21:23:21	2021-06-05 21:35:28	1	4	2	1	2	2	3		3		2		1	2	2	2	3	4	3	2	5	4	2	2	4	2	4	5	5	4	1	4	3	2	2	1	62	1	3	1	0	1	1	2	1
418	12718103731	405035993	2021-06-05 16:48:08	2021-06-05 16:56:08	1	5	1	1	3	2	3		2		1		1	1	2	2	3	3	2	5	2	2	2	3	2	5	2	2	2	2	2	3	3	2	3	2	52	1	2	0	1	3	2	1	2
419	12718049246	405035993	2021-06-05 15:50:55	2021-06-05 16:27:36	1	1	1	2	1	1	4		2		1		1	1	0	2	2	1	2	1	3	1	1	1	1	1	1	4	1	1	2	1	1	1	1	1	28	0	0	0	0	0	0	0	0
420	12718011318	405035993	2021-06-05 15:10:38	2021-06-05 15:16:40	1	4	1	1	2	2	2		2		1		1	1	1	2	3	4	3	2	3	2	1	2	2	3	4	4	2	4	4	5	3	4	3	2	60	1	1	0	0	0	0	0	0
[truncated: 22 more columns]
